# Orientation control strategies and adaptation to a visuomotor perturbation in rotational hand movements

Or Zruya<sup>1</sup> and Ilana Nisky<sup>1,2</sup>

**1** Department of Biomedical Engineering, Ben Gurion University of the Negev , Beer Sheva, Israel

**2** Department of Engineering, University of Cambridge, Cambridge CB2 1PZ, U.K

## Abstract

Computational approaches to biological motor control are used to discover the building blocks of human motor behavior. Models explaining features of human hand movements have been studied thoroughly, yet only a few studies attempted to explain the control of the orientation of the hand; instead, they mainly focus on the control of hand translation, predominantly in a single plane. In this study, we aimed to establish a basic understanding of the way humans control the orientation of their hands. We developed a quaternion-based score that quantifies the geodicity of rotational hand movements and evaluated it experimentally. In the first experiment participants performed a simple orientation-matching task with a robotic manipulator. We found that rotations are generally performed by following a geodesic in the quaternion hypersphere, which suggests that, similarly to translation, the orientation of the hand is centrally controlled. We also established a baseline for the study of human response to perturbed visual feedback of the orientation of the hand. In the subsequent second experiment we studied the adaptation of participants to visuomotor rotation that is applied on the hand's rotation, and the transfer of the adaptation to a different initial orientation. We observed partial adaptation to the perturbation. The patterns of the transfer of the adaptation to a different initial orientation were consistent with the representation of the orientation in extrinsic coordinates. The results of the two experiments raise

questions regarding the nature of central control of hand orientation. Discussion and intuitions from these results can be of benefit for many applications that involve fine manipulation of rigid bodies, such as teleoperation and neurorehabilitation.

## Author summary

Daily motor actions, as simple as pouring a glass of wine or as complicated as playing a violin, require coordinated activation of multiple muscles that synchronize to produce a precise motion of the hand. Controlled by sensorimotor areas in the central nervous system, our muscles can translate and rotate our hand from one posture to another. Our study focused on the very basis of the control of orientation: we attempted to reveal which variables are centrally controlled when we rotate our hand. The discovery that simple rotations are generally performed along a geometrically optimal path established a baseline for studying the response to rotation-based perturbations. By visually remapping the orientation of the hand, we found that humans perceive their hand's orientation in visual, rather than joint-based coordinates. These findings have implications for the design of human-centered control systems for teleoperation, where visual distortions may occur, and for the design of rehabilitation devices for people with motor impairments.

## Introduction

Precise control of the position and orientation of the hand is key to accurately performing daily object manipulation tasks. To discover the building blocks of human motor control, experimental and computational approaches may be used. These building blocks are often considered to be motor invariants - robust patterns that can be quantified in human movements. They are typically observed across repetitions of the same movements within and between participants, and are considered to be the result of active control by the nervous system [1]. One such invariant is the straight path and bell-shaped velocity trajectory that characterise fast point-to-point movement; these may result from the optimization of movement smoothness [1-4]. This invariant may also suggest that point-to-point hand movements are primarily under kinematic

control in extrinsic coordinates that minimizes reaching errors. This hypothesis is reinforced by the robustness of the invariant to visual [5,6] and dynamical [7,8] distortions, and is explained by models of stochastic optimal control [9–11], deterministic optimal control [1] and state-space models [12–15]. Other studies claimed that control strategies also depend on the cognitive perception of the task. For example, straight paths in joint space were observed when a two-link arm was controlled, rather than just the endpoint position [16].

Controlling motion involves the mapping of sensory input to motor output. It is generally held that this mapping is closely tied to the acquisition of an internal model of the motor apparatus [7,17,18]. The internal model may be composed of a forward model that predicts sensory consequences of a given motor command [19,20], and an inverse model that specifies the motor commands required to produce a desired sensory output. The internal model may be used to compensate for estimation error [9], and to stabilize the control system [21]. Important supporting evidence for the existence of internal models is motor adaptation – the recovery of performance in response to a changed environment [7,22]. The nature of the internal models is often investigated by studying motor adaptation in the face of perturbations and their aftereffects, generalization, and transfer upon removal of the perturbation. For example, adaptation to visuomotor rotation (a remapping between hand movement and visual display) was shown to be learned in extrinsic, rather than intrinsic, hand coordinates [22], although mixed coordinates have also been proposed [23,24].

In contrast to the control of translational movements allowing for the transfer of objects from one position in space to another, the control of rotational movements allowing for a change of the orientation of objects from one orientation to another has not received much attention. Studies of reach to grasp movements reported features similar to two-dimensional translations, such as typical bell-shaped angular velocity profiles [25], and showed evidence of grasp anticipation and orientation online corrections [26]. Moreover, hand orientation for grasping was found to be coupled with reaching direction [27,28] and target orientation [29], but also related to the posture of the arm, suggesting that both extrinsic and intrinsic variables are controlled [30,31]. The hypothesis that position and orientation are controlled simultaneously was supported by a gradient-based model that predicted the coarticulation of hand

translation and rotation along a path generated during reach to grasp [32]. Nevertheless, 44  
evidence for separate control of position and orientation in reach to grasp were also 45  
observed [29, 33]. For example, parallel control channels for position and orientation 46  
were evidenced by the lack of variation in variable errors between orientation matching 47  
with and without hand translation [30], which supports the three-component hypothesis 48  
- prehension movements are controlled through channels for the translation, the 49  
manipulation, and the orientation of the hand [34]. 50

Two-dimensional wrist rotations were the main focus in studies of pointing 51  
movements that mapped the orientation of a constrained wrist to a position of a point 52  
cursor on a screen [35–37]. One such study found that the projected paths of the wrist 53  
rotations are more variable and curved than planar reaching movements, which may 54  
suggest that wrist rotations are not under kinematic control. Yet, the difference in the 55  
curvature of the projected wrist rotation of inbound and outbound pointing suggested 56  
that these results are an outcome of imperfect peripheral execution of the motor 57  
command [36]. Other studies found robust motor invariants in kinematically redundant 58  
moderate pointing movements that involve both the wrist and the forearm, such as the 59  
fact that the cursor's path follows Donders' law for dimensionality reduction [38–40]. 60  
These stereotypical patterns were later attributed to strategies that use wrist 61  
flexion-extension and wrist radial-ulnar deviations, but not forearm 62  
pronation-supination [41]. A few studies also attempted to investigate adaptation to 63  
perturbations during wrist pointing. For example, a study of torque field adaptation 64  
found evidence for central control of orientation, as the projected path's curvature 65  
increased when the torque field was suddenly reversed [35]. Another study that 66  
employed visuomotor rotation on the cursor's path showed that a phase shift between 67  
the intrinsic (body-fixed) and extrinsic (space-fixed) frames worsened adaptation [37]. 68  
This adaptation was later shown to be compensated and narrowly generalized to 69  
different directions [42], similarly to visuomotor rotation in studies of point-to-point 70  
movements [22]. 71

Common to these wrist pointing studies is the mapping from hand orientation to 72  
cursor position visualized on a two-dimensional screen. However, these studies do not 73  
tell us how humans control three-dimensional rotations of the hand while manipulating 74  
a three-dimensional object, and how they adapt to visuomotor perturbations in such 75



rotations. A study of rotation gain adaptation provided three-dimensional visual feedback by aligning the orientation of a manipulated virtual object to that of the hand, and revealed the construction of a transferable internal model [43]. However, except for the latter study, the strategies used to control the orientation of a rigid body which is held by the hand remain largely unknown.

In this study, we aimed to bridge this gap, and investigate hand orientation control and adaptation strategies without reducing the degrees of freedom of the object's orientation. To achieve that, we visualized the orientation of the controlled object using a three-dimensional cube, and analyzed its trajectory using quaternions - one of the common representations of orientation. We set out to answer two sequential questions. First, we approached the fundamental question of whether simple hand rotations are under kinematic control of the sensorimotor system. We therefore developed a score to quantify rotation geodicity in quaternion space and evaluated it in an orientation matching task. If rotations are indeed centrally controlled, we expect to observe evidence of path planning optimization. Indeed, we found a tendency to follow geodesics, which established a baseline of response to perturbed hand orientation, and inspired our second question of interest - in which coordinate system is the orientation of a rigid body represented? By remapping the orientation of the hand and applying adaptation and generalization paradigms, we tested whether humans use extrinsic or intrinsic coordinates. Under each hypothesis, we expect to observe transfer of adaptation to a different initial hand orientation when the perturbation was learned and transferred to similar targets in extrinsic or intrinsic coordinates. Our results support the hypothesis that humans use extrinsic coordinates.

## Methods

### Notation

Throughout this paper, scalar values are denoted by small italic letters (e.g.,  $x$ ), vector values are denoted by small bold letters (e.g.,  $\mathbf{x}$ ), matrices are denoted by large bold letters (e.g.,  $\mathbf{X}$ ) and geometrical spaces are denoted by blackboard letters (e.g.,  $\mathbb{X}$ ).

## Mathematical formulation

The manipulation of a rigid body in three-dimensional space involves movement with six degrees of freedom. Three degrees of freedom are associated with translation - the movement of the origin of a reference frame that is attached to the body, and the other three are associated with rotation of the reference frame about an axis. Pose-to-pose movements require the hand to accurately translate and rotate a rigid body to a target pose. Such six-degree-of-freedom movement is composed of point-to-point movement (i.e., the translation of a rigid body between two points in space) and of an orientation-matching movement (i.e., the rotation of a rigid body between two orientations in space). Our study investigates the rotational component of the movement. We considered rotations represented by unit quaternions, denoted by  $\mathbf{q} \in \mathbb{H}_1$ .  $\mathbb{H}_1$  is the space of unit quaternions and is also known as the 3-sphere - a 4-dimensional unit size sphere. Quaternions are hyper-complex numbers comprised of a real part  $s \in \mathbb{R}$  and an imaginary part  $\mathbf{v} = [x, y, z] \in \mathbb{R}^3$ , such that  $\mathbf{q} = s + \hat{\mathbf{i}}x + \hat{\mathbf{j}}y + \hat{\mathbf{k}}z \in \mathbb{H}_1$ ,  $\hat{\mathbf{i}}^2 = \hat{\mathbf{j}}^2 = \hat{\mathbf{k}}^2 = \hat{\mathbf{i}}\hat{\mathbf{j}}\hat{\mathbf{k}} = -1$ ,  $\hat{\mathbf{i}}\hat{\mathbf{j}} = \hat{\mathbf{k}}$  and  $\hat{\mathbf{j}}\hat{\mathbf{i}} = -\hat{\mathbf{k}}$ . According to Euler's theorem, for any  $\mathbf{q} \in \mathbb{H}_1$ , there exists an angle  $\theta \in (-\pi, \pi]$  and an axis  $\hat{\mathbf{n}} \in \mathbb{R}^3$ , such that:

$$\mathbf{q} = \cos \theta/2 + \hat{\mathbf{n}} \sin \theta/2, \quad (1)$$

where  $\mathbf{q}$  is the quaternion that takes a point  $\mathbf{p} \in \mathbb{R}^3$  and rotates it  $\theta$  around  $\hat{\mathbf{n}}$  to get  $\mathbf{p}'$ :

$$\mathbf{p}' = \mathbf{q}\mathbf{p}\mathbf{q}^{-1}. \quad (2)$$

Let  $\{\mathbf{q}\}_{i=1}^N$  be a discrete time  $N$ -sample orientation trajectory (e.g., of the handle of the robotic manipulator - see the Experimental setup and software section for details), such that  $\mathbf{q}_i = \cos \theta_i/2 + \hat{\mathbf{n}}_i \sin \theta_i/2$  is the quaternion that rotates all the vectors represented in an identity frame (i.e., with orientation  $\mathbf{q}_I = 1$ ) by an angle  $\theta_i$  around an axis  $\hat{\mathbf{n}}_i$ . We denote the discrete time trajectory of the transition quaternion as  $\{\mathbf{q}^\delta\}_{i=1}^{N-1}$ , such that  $\mathbf{q}_i^\delta = \cos \theta_i^\delta/2 + \hat{\mathbf{n}}_i^\delta \sin \theta_i^\delta/2$  is the quaternion that rotates  $\mathbf{q}_i$  to  $\mathbf{q}_{i+1}$  by an instantaneous angle  $\theta_i^\delta$  around an instantaneous axis  $\hat{\mathbf{n}}_i^\delta$ . The instantaneous rotation

axis can be represented in either extrinsic or intrinsic coordinates: 128

$$\text{Extrinsic representation : } \mathbf{q}_{i+1} = \mathbf{q}_i^\delta \mathbf{q}_i, \quad (3)$$

$$\text{Intrinsic representation : } \mathbf{q}_{i+1} = \mathbf{q}_i \mathbf{q}_i^\delta. \quad (4)$$

The product is generally different since quaternion multiplication is not commutative. 129

Two-dimensional translations - the well-studied reaching movements - are performed by following a straight path in extrinsic coordinates. In differential geometry, the straight path is considered to be a geodesic in  $\mathbb{R}^2$  - the shortest path that connects two points in the plane. Since all unit quaternions lie on the 3-sphere, a geodesic in  $\mathbb{H}_1$  is the shortest great arc connecting two quaternions. A geodesic in  $\mathbb{H}_1$  between  $\mathbf{q}_1$  and  $\mathbf{q}_N$  is comprised of all quaternions  $\mathbf{q}_g \in \mathbb{H}_1$  that are parametrized by  $h \in [0, 1]$  and obey [44]: 130

$$\mathbf{q}_g(\mathbf{q}_1, \mathbf{q}_N, h) = \mathbf{q}_1 (\mathbf{q}_1^* \mathbf{q}_N)^h, \quad (5)$$

where  $\mathbf{q}_1^* = \mathbf{q}_1^{-1}$  is the conjugate of  $\mathbf{q}_1$ . A geodesic between  $\mathbf{q}_1 = \mathbf{q}_I$  and  $\mathbf{q}_N = \cos \theta_N / 2 + \hat{\mathbf{n}}_N \sin \theta_N / 2$  results in the following path: 131

$$\begin{aligned} \mathbf{q}_g(\mathbf{q}_I, \mathbf{q}_N, h) &= \mathbf{q}_I (\mathbf{q}_I^* \mathbf{q}_N)^h \\ &= \mathbf{q}_N^h \\ &= \cos h\theta_N / 2 + \hat{\mathbf{n}}_N \sin h\theta_N / 2. \end{aligned} \quad (6)$$

Eq 6 suggests that a geodesic in  $\mathbb{H}_1$  is achieved by scaling  $\theta_N$  according to  $h$ , and that the axis from Eq 1 is constant and is equal to  $\hat{\mathbf{n}}_N$ . However, this does not generalize to initial orientations that differ from  $\mathbf{q}_I$ . For that reason, when we analyzed quaternion curves, we first rotated all quaternions by the inverse of the initial orientation. This is justified since the rotation operation does not alter the geodicity of a quaternion curve, such that for any  $\mathbf{q}_1 \in \mathbb{H}_1$ : 132

$$\mathbf{q}_g(\mathbf{q}_1, \mathbf{q}_N, h) = \mathbf{q}_1 \mathbf{q}_g(\mathbf{q}_I, \mathbf{q}_1^{-1} \mathbf{q}_N, h). \quad (7)$$

By inserting Eq 5 into the right side of Eq 7 we get:

$$\begin{aligned}
 \mathbf{q}_1 \mathbf{q}_g (\mathbf{q}_I, \mathbf{q}_1^{-1} \mathbf{q}_N, h) &= \mathbf{q}_1 \mathbf{q}_I (\mathbf{q}_I^* \mathbf{q}_1^{-1} \mathbf{q}_N)^h \\
 &= \mathbf{q}_1 (\mathbf{q}_1^{-1} \mathbf{q}_N)^h \\
 &= \mathbf{q}_1 (\mathbf{q}_1^* \mathbf{q}_N)^h \\
 &= \mathbf{q}_g (\mathbf{q}_1, \mathbf{q}_N, h).
 \end{aligned} \tag{8}$$

We can also acquire the transition quaternion trajectory  $(\{\mathbf{q}^\delta\}_{i=1}^{N-1})$  for a geodesic by inserting Eq 6 into Eq 3 or Eq 4:

$$\begin{aligned}
 \mathbf{q}_i^\delta &= \mathbf{q}_N^{h_{i+1}} \mathbf{q}_N^{-h_i} \\
 &= \mathbf{q}_N^{\Delta h_i} \\
 &= \cos \Delta h_i \theta_N / 2 + \hat{\mathbf{n}}_N \sin \Delta h_i \theta_N / 2,
 \end{aligned} \tag{9}$$

where  $\Delta h_i = h_{i+1} - h_i$ . Eq 9 suggests that the instantaneous rotation angle  $\theta_i^\delta$  is scaled according to  $\Delta h_i$ , and that the instantaneous rotation axis is constant and equal to  $\hat{\mathbf{n}}_N$ .

In experiment 1, we developed a quaternion-based score that quantifies the geodicity of rotational hand movements and evaluated it in an orientation-matching experiment. First, we defined the angular distance between two quaternions  $\mathbf{q}_i$  and  $\mathbf{q}_{i+1}$  using the angle of the transition quaternion:

$$\text{dist}(\mathbf{q}_i, \mathbf{q}_{i+1}) = 2 \arccos | \Re(\mathbf{q}_{i+1} \mathbf{q}_i^{-1}) |, \tag{10}$$

where the distance is bounded to  $[0, \pi)$ . Additionally,  $\text{dist}(\mathbf{q}_i, -\mathbf{q}_i) = 0$ , as  $\mathbf{q}_i$  and  $-\mathbf{q}_i$  are equal by definition. Then, we defined the Quaternion Geodicity Score (QGS) of a curve  $\{\mathbf{q}\}_{i=1}^N$  as follows:

$$\text{QGS} = \frac{\sum_{i=1}^{N-1} \text{dist}(\mathbf{q}_i, \mathbf{q}_{i+1})}{\text{dist}(\mathbf{q}_1, \mathbf{q}_N)} \in [1, \infty). \tag{11}$$

A geodesic in  $\mathbb{H}_1$  yields  $\text{QGS} = 1$ . This is proved by inserting Eq 9 and Eq 10 into

Eq 11 and using the sum of a telescopic sequence:

158

$$\begin{aligned} \text{QGS} &= \frac{\sum_{i=1}^{N-1} 2 \arccos |\Re(\mathbf{q}_{i+1}\mathbf{q}_i^{-1})|}{2 \arccos |\Re(\mathbf{q}_N\mathbf{q}_1^{-1})|} \\ &= \frac{\sum_{i=1}^{N-1} \Delta h_i \theta_N}{\theta_N} \\ &= h_N - h_1 = 1. \end{aligned} \tag{12}$$

Equation 11 suggests that the QGS of a rotational movement is the ratio between the angular displacement accumulated during the movement and the angular displacement achieved by a geodesic. A non-geodesic receives  $\text{QGS} > 1$ , as it requires that the orientation of the rigid body would deviate from the great-arc that connects the initial and final quaternions, resulting in a longer path to be traveled in  $\mathbb{H}_1$ .

159

160

161

162

163

## Experimental setup and software

164

The experimental setup consisted of a developed simulation in a virtual environment (VE) using CHAI3D 3.2 API, written in C++ (Visual Studio 2013, Microsoft) on a HP Z440 PC running Windows 10 OS (Microsoft). Participants viewed the VE through a three-dimensional viewer HMZ-T3W (Sony) and interacted with it using the handle of a SIGMA 7 (Force Dimension) robotic manipulator. The three-dimensional viewer was mounted on a metal frame and directed at  $45^\circ$  towards the robotic handle (Fig 1a). We implemented a haptic thread rendered at 4 [kHz] and a visual thread rendered at 60 [Hz], simultaneously. To enable a three-dimensional view of the VE, we presented each eye with a visual resolution of 1080p.

165

166

167

168

169

170

171

172

173

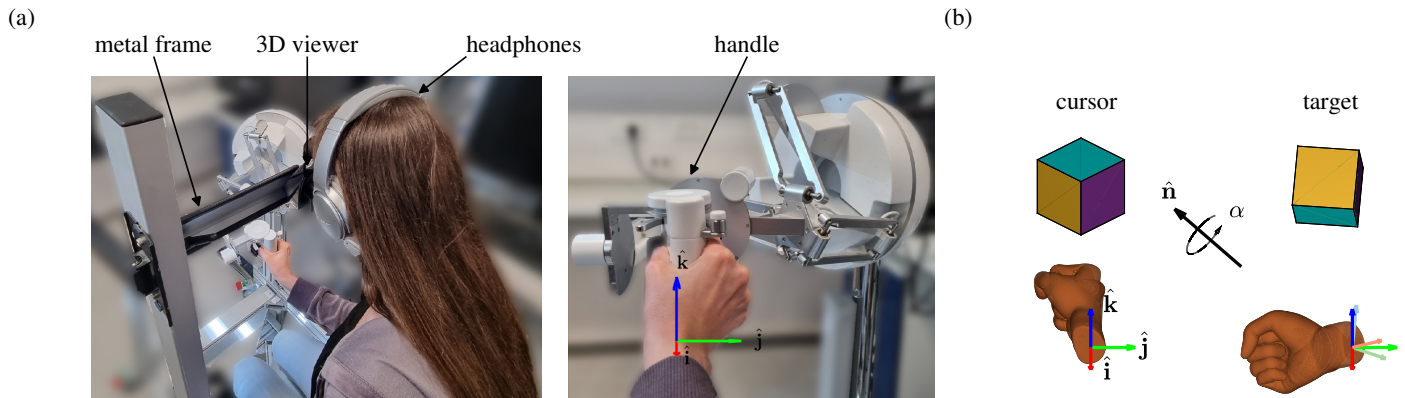

**Fig 1. Experimental setup and orientation-matching task.** (a) Participants were seated in front of a robotic manipulator and interacted with it using their right hand. We projected the VE onto the three-dimensional viewer that was mounted on a metal frame and directed at  $45^\circ$  towards the robotic manipulator. To avoid external interruptions, participants wore noise cancelling headphones. (b) Participants controlled the orientation of a cursor cube that was positioned at the center of the VE by rotating their right hand. They were instructed to match the orientation of the cursor cube to that of a target cube, which was rotated  $\alpha$  around  $\hat{n}$  with respect to the initial cursor orientation. An example of initial cursor orientation (left) and target orientation (right) are illustrated, along with the orientation of the participant's right hand. The dark red, green and blue arrows depict an extrinsic reference frame, and the light arrows depict an intrinsic reference frame (the frames are aligned when the hand is oriented  $\mathbf{q}_I$ , as in the initial orientation shown here).

The participants sat in front of the robotic manipulator, looked into the three-dimensional viewer and held the handle of the robotic manipulator with their right hand. When the participant's hand was oriented as  $\mathbf{q}_I$ ,  $x^+$  was directed from the handle towards the body,  $y^+$  was directed from the handle to the right hand side of the participant and  $z^+$  was directed from the handle upwards. To secure the participant's hand to the handle, we fitted two velcro loops around their thumb and index fingers (Fig 1a). Prior to the beginning of the experiments, we introduced the VE to the participants and briefed them regarding how to hold the handle.

## Procedure and protocol

### Experiment 1

The VE consisted of a virtual cursor cube (Fig 1b) positioned at the center of the VE. Participants controlled the orientation of the cursor by rotating the handle of the robotic manipulator. To provide veridical visual feedback of the orientation of the handle, we did not apply any transformation between the orientation of the handle and the cursor. Participants only controlled the orientation of the cursor and not its

position, which remained constant throughout the experiment. To break the cube's symmetry, we colored each of the side faces differently. We directed the virtual camera at  $45^\circ$  towards the cube to match the direction of the three-dimensional viewer with respect to the handle. We did not constrain the movement of the arm, such that participants were able to utilize the shoulder, elbow and wrist joints. Additionally, we applied gravity compensation to support the hand and the robotic handle using a translational operational space PD controller with a proportional gain  $K_p = 100$  [N/m] and a linear damping gain  $K_D = 30$  [N·s/m]. Prior to each trial, the same controller was used to translate the hand of the participant to the initial orientation.

Fourteen right handed volunteers participated in experiment 1 (11 males and 3 females, all in the age range of 24-34). All participants signed an informed consent form approved by the Human Participants Research Committee of Ben-Gurion University of the Negev, Beer-Sheva, Israel. The participants were naive with regard to the purpose of the experiments and were reimbursed for their participation.

The experiment consisted of 408 trials, in which we instructed the participants to match the orientation of the cursor cube with that of a second identical cube, referred to as the target, by rotating the handle of the robotic manipulator using their right hand. To minimize external influence on the formed orientation trajectories, we did not instruct the participants to follow any strategy nor did we limit the trial's duration. At the beginning of each trial, a fixed target appeared in one of four random positions in the y-z plane of the VE - above, below, to the right or to the left of the cursor. To avoid participants getting used to a certain target position, we pseudo-randomized their order beforehand, such that targets appeared at each position in an equal number of trials. To present the target, we rotated the initial orientation of the cursor by an angle  $\alpha$  around an axis  $\hat{\mathbf{n}}$  (Fig 1b). In each trial, we sampled the rotation angle pseudo-randomly from a uniform distribution, i.e.,  $\alpha \sim U[40^\circ, 60^\circ]$ . Participants were cued to initiate their movement when the target appeared. We ended the trial when the angular distance between the orientations of the cursor and of the target, as defined in Eq 10, decreased below  $10^\circ$  for a period of 100 [ms], or when it decreased below  $15^\circ$  for a period of 400 [ms]. We added the latter, more lenient, condition to avoid frustration among participants. As each trial ended, we removed the target and turned the cursor red, while the robotic manipulator autonomously translated and rotated to the initial

position and orientation for the subsequent trial. To reorient the handle, we applied three-degree-of-freedom torques using a rotational operational space PD controller with a proportional gain  $K_p = 0.5$  [N·m/rad] and an angular damping gain  $K_D = 0.07$  [N·m/s·rad]. To provide smooth autonomous rotation, we provided the handle with a minimum-jerk input torque signal. We initiated the next trial when the angular distance between the orientation of the handle and the initial orientation of the next trial decreased below  $5^\circ$  for a period of 100 [ms]. Then, we colored the faces of the cube as before and presented the participants with a new target.

To test the effect of the initial orientation of the hand on the geodicity of the path, we chose the initial orientation of the hand to be one of two orientations in half of the trials ( $\mathbf{o}_1$  and  $\mathbf{o}_2$ , Table 1). Similarly, to test the effect of the target orientation, we chose it to be one of two orientations in the other half of the trials ( $\mathbf{t}_1$  and  $\mathbf{t}_2$ , Table 1). The initial cursor and target orientations were chosen to allow feasible rotations within the limits of the rotational workspace of the hand and the handle.

**Table 1. Initial cursor and target orientations and rotation axes.**

| Initial orientation                                                                        | Target orientation                                                                         |
|--------------------------------------------------------------------------------------------|--------------------------------------------------------------------------------------------|
| $\mathbf{o}_1 = 0.92 + 0.33\hat{\mathbf{i}} - 0.06\hat{\mathbf{j}} + 0.16\hat{\mathbf{k}}$ | $\mathbf{t}_1 = 0.84 - 0.13\hat{\mathbf{i}} - 0.22\hat{\mathbf{j}} + 0.48\hat{\mathbf{k}}$ |
| $\mathbf{o}_2 = 0.92 + 0.16\hat{\mathbf{i}} - 0.06\hat{\mathbf{j}} + 0.33\hat{\mathbf{k}}$ | $\mathbf{t}_2 = 0.9 - 0.04\hat{\mathbf{i}} - 0.08\hat{\mathbf{j}} + 0.42\hat{\mathbf{k}}$  |
| Aligned axes                                                                               | Misaligned axes                                                                            |
| $\hat{\mathbf{i}}$                                                                         | $\hat{\mathbf{i}}/\sqrt{2} + \hat{\mathbf{k}}/\sqrt{2}$                                    |
| $-\hat{\mathbf{j}}$                                                                        | $-\hat{\mathbf{j}}/\sqrt{2} + \hat{\mathbf{k}}/\sqrt{2}$                                   |
| $\hat{\mathbf{k}}$                                                                         | $\hat{\mathbf{i}}/\sqrt{2} - \hat{\mathbf{j}}/\sqrt{2}$                                    |

For a given initial orientation, we chose a target orientation that would allow us to test for the effect of the alignment of the ideal rotation axis (i.e., the axis that one should rotate around to move along a geodesic) on the QGS. Therefore, we chose rotation axes that were aligned or misaligned with either an extrinsic or an intrinsic reference frame (see Table 1). If rotation around aligned axes would result in lower QGS values than rotation around misaligned axes, this could imply that the alignment has significance in the control of orientation by the sensorimotor system. Moreover, it would hint that the sensorimotor system uses either intrinsic or extrinsic Euler angles - three consecutive rotations around key axes in intrinsic or extrinsic coordinates - to represent the orientation of rigid bodies.



The experiment consisted of two sessions: Training and Test (Fig 2). The Training session (not analyzed) consisted of one set of 24 trials. The Test session consisted of eight sets of 48 trials each. We pseudo-randomized the order of trials within each set beforehand, and provided participants with a one minute break after each set. In the Training session, participants performed six trials starting from  $\mathbf{o}_1$  and six trials starting from  $\mathbf{o}_2$ . To present participants with the target, we rotated the initial cursor orientation around one of three axes that were aligned to either an extrinsic or an intrinsic reference frame (see Eq 3 and Eq 4). In addition, participants performed six trials towards  $\mathbf{t}_1$  and six trials towards  $\mathbf{t}_2$ . To present participants with the initial cursor orientation, we inversely rotated the targets around the same axes.

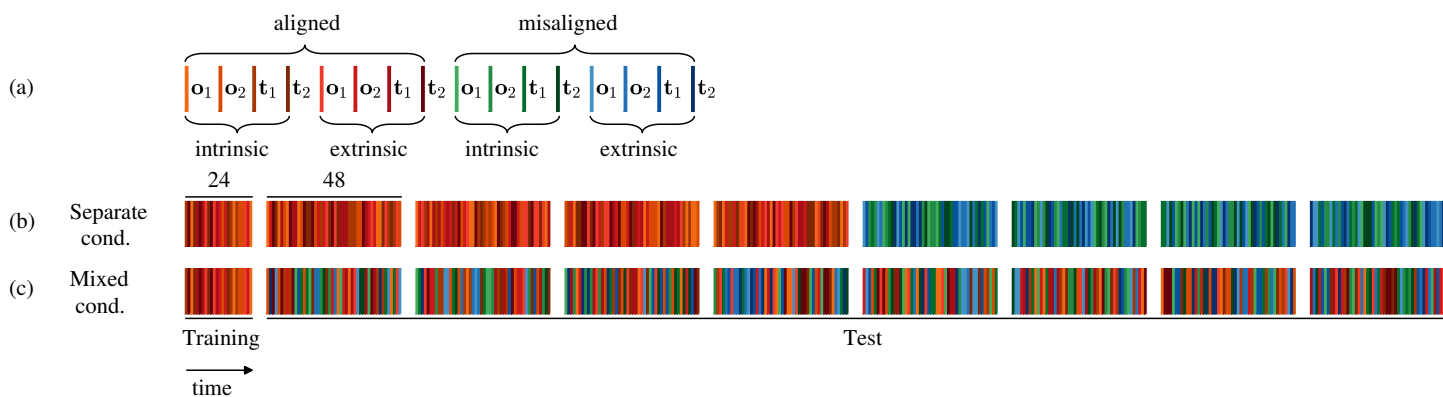

**Fig 2. Experimental design and participants groups - experiment 1.** The experiment consisted of two sessions: Training (24 trials) and Test (48×8 trials). In the Training session, all targets were presented by rotating the initial cursor orientation around an axis that was aligned to either an intrinsic or an extrinsic reference frame. The Test session of the Separate cond. group contained four trial sets with aligned axes followed by four trial sets with misaligned axes. The Test session of the Mixed cond. group contained eight trial sets with mixed aligned and misaligned axes. In both groups, half of the trials initiated from two fixed initial hand orientations ( $\mathbf{o}_1$  and  $\mathbf{o}_2 \in \mathbb{H}_1$ ), while the rest had two fixed target orientations ( $\mathbf{t}_1$  and  $\mathbf{t}_2 \in \mathbb{H}_1$ ). (a) Legend for the different experimental conditions of each trial. (b) The order of the trials in the Separate cond. group. (c) The order of the trials in the Mixed cond. group.

In the Test session, we split the participants into two groups of seven participants: Mixed cond. and Separate cond. In the Mixed cond. group, all sets consisted of 24 trials in which the targets were rotated around an axis aligned with either an extrinsic or an intrinsic reference frame, and another 24 trials in which the rotation axes were misaligned with either one of these frames. In the Separate cond. group, the first four sets consisted of 48 trials with axes that were aligned to either reference frame, and the

remaining four sets consisted of 48 trials with axes that were misaligned with the reference frames. Throughout the Test session, each participant performed eight repetitions of each trial with the same initial and target orientations.

## Experiment 2

The distribution of the QGS in experiment 1 led us to conclude that orientation-matching movements are generally performed by following a geodesic in  $\mathbb{H}_1$ . This result established a baseline for studying adaptation and generalization of rotation-based perturbation during an orientation-matching task. If we had not seen such evidence of path planning optimization, we would not have been able to compare rotational variables between non-perturbed and perturbed movements.

In this experiment, we applied a visuomotor rotation transformation between the rotation of the handle of the robotic manipulator and a three-dimensional cursor. Let  $\mathbf{q}_r = \cos \theta_r/2 + \hat{\mathbf{n}}_r \sin \theta_r/2$  be the visuomotor rotation, where  $\theta_r = 60^\circ$  is the perturbation angle and  $\hat{\mathbf{n}}_r = \hat{\mathbf{i}}$  is the perturbation axis. The perturbation angle was chosen such that the effects of adaptation and transfer, if observed, could be large enough compared to the natural variability of human movements [35,36]. We used  $\mathbf{q}_r$  to perturb the extrinsically represented instantaneous axis ( $\hat{\mathbf{n}}^\delta$ ) to achieve the perturbed instantaneous axis ( $\hat{\mathbf{n}}_p^\delta$ ) using Eq 2:

$$\hat{\mathbf{n}}_p^\delta = \mathbf{q}_r \hat{\mathbf{n}}^\delta \mathbf{q}_r^{-1}. \quad (13)$$

The perturbed instantaneous axis is generally a noisy signal and is ill-defined when the angular velocity is low. To avoid noisy visual feedback, we considered a delayed signal, such that  $\mathbf{q}_i^\delta = \mathbf{q}_{i+D} \mathbf{q}_i^{-1}$ , where  $D = 80$  is the delay in samples. This resulted in a 20 [ms] visual delay, which is considered to be unnoticeable [45]. A sudden exposure to the perturbation causes a deviation from the desired visual scene. If one starts with initial orientation  $\mathbf{q}_I$  and matches it to a target  $\mathbf{q}_t = \cos \theta_t/2 + \hat{\mathbf{n}}_t \sin \theta_t/2$  by following a geodesic, then the visuomotor rotation would result in perturbed trajectories:

$$\mathbf{q}_{p,i} = \cos h_i \theta_t/2 + \mathbf{q}_r \hat{\mathbf{n}}_t \mathbf{q}_r^{-1} \sin h_i \theta_t/2, \quad (14)$$

$$\mathbf{q}_{p,i}^{\delta} = \cos \Delta h_i \theta_t / 2 + \mathbf{q}_r \hat{\mathbf{n}}_t \mathbf{q}_r^{-1} \sin \Delta h_i \theta_t / 2. \quad (15)$$

One way to compensate for the perturbation is to learn the inverse rotation ( $\mathbf{q}_r^{-1}$ ) by constructing an internal model of the perturbation. Once built, the internal model can be used to rotate around an inversely rotated axis ( $\hat{\mathbf{n}}_c = \mathbf{q}_r^{-1} \hat{\mathbf{n}}_t \mathbf{q}_r$ ) using a feed-forward control to achieve the desired unperturbed visual scene ( $\mathbf{q}_{up}$ ):

$$\begin{aligned} \mathbf{q}_{up,i} &= \cos h_i \theta_t / 2 + \mathbf{q}_r \hat{\mathbf{n}}_c \mathbf{q}_r^{-1} \sin h_i \theta_t / 2 \\ &= \cos h_i \theta_t / 2 + \mathbf{q}_r (\mathbf{q}_r^{-1} \hat{\mathbf{n}}_t \mathbf{q}_r) \mathbf{q}_r^{-1} \sin h_i \theta_t / 2 \\ &= \cos h_i \theta_t / 2 + \hat{\mathbf{n}}_t \sin h_i \theta_t / 2. \end{aligned} \quad (16)$$

To test whether the inverse rotation was implemented, it is common to remove the perturbation and check for an aftereffect of adaptation while repeating the same task. Assuming the perturbation was fully compensated, a complete aftereffect will result in rotation around an inversely perturbed axis ( $\mathbf{q}_{ip,i} = \cos h_i \theta_t / 2 + \mathbf{q}_r^{-1} \hat{\mathbf{n}}_t \mathbf{q}_r \sin h_i \theta_t / 2$ ). If the aftereffect is incomplete (i.e.,  $\theta_t < \theta_r$ ), then the hand would rotate around an axis inversely perturbed by the amount of the aftereffect. If the target is accurately matched, then there is no aftereffect.

To probe in which representation the internal model of the perturbation is built, we removed the perturbation after a training phase. We tested for an aftereffect in the transfer of the adaptation to an orthogonal initial hand orientation - the initial orientation used during training rotated 90° around  $\hat{\mathbf{i}}$ . As in Eq 16, a transfer could be achieved by learning the inverse rotation ( $\mathbf{q}_r^{-1}$ ), and applying it on the axis that corresponds to a geodesic starting from the new initial orientation.

Thirty right handed volunteers participated in experiment 2 (13 males and 17 females, all in the age range of 23-28). All participants signed an informed consent form approved by the Human Participants Research Committee of Ben-Gurion University of the Negev, Beer-Sheva, Israel. The participants were naive with regard to the purpose of the experiments and were reimbursed for their participation.

The experiment consisted of 420 trials, in which the participants were required to perform the orientation-matching task with a single, fast hand rotation. Each trial began with the appearance of the target to the left of the cursor. To present the target,

we rotated the initial cursor orientation by  $50^\circ$  around an axis. We considered the  
movement's initiation time at the first time stamp in which the angular speed exceeded  
 $0.25$  [rad/s]. In order to avoid considering unintentional stops as the termination of the  
movement, we considered the first time stamp in which the angular speed dropped  
below  $0.25$  [rad/s], after exceeding  $1$  [rad/s], to be the movement's termination.  
Following each movement, we removed the target and the cursor turned red, while the  
robotic manipulator autonomously translated and rotated to the initial position and  
orientation of the subsequent trial using the same controllers as in experiment 1. In  
order to guide the participants to perform their movements within a desired duration  
range and to reduce variability in the data, we displayed feedback regarding the  
duration of the movement. We displayed a "Move Slower" notification if the movement  
lasted less than  $400$  [ms] and a "Move faster" notification if it lasted more than  $600$  [ms].  
We displayed an "Exact" notification to the side of the duration feedback if the  
cursor-to-target angular distance at the time of trial termination was lower than  $15^\circ$ .  
We displayed a "Perfect" notification if both duration and accuracy conditions were  
satisfied. Following that, we initiated the next trial when the angular distance between  
the orientations of the cursor and the next initial orientation decreased below  $5^\circ$  for  
 $100$  [ms]. Then, we colored the cursor back as before (see Fig 1b), and presented  
participants with a new target.

The experimental protocol, inspired by [8], is summarized in Fig 3. To familiarize  
participants with the orientation-matching task, they performed 60 familiarization trials  
without any perturbation (not analyzed). Participants performed the first 30 trials  
starting from the unrotated state of the hand ( $\mathbf{o}_1 = \mathbf{q}_I$ ). In the next 30 trials, we  
rotated the initial orientation by  $90^\circ$  around  $\hat{\mathbf{i}}$  ( $\mathbf{o}_2 = 1/\sqrt{2} + \hat{\mathbf{i}}/\sqrt{2}$ ). The rest of the  
experiment consisted of three sessions: Baseline (BL), Training (TRN) and Transfer  
(TFR). In the BL session, participants performed the task for two sets of 60 trials each  
(BL1 and BL2) without any perturbation. Trials in BL1 started from  $\mathbf{o}_1$ , while trials in  
BL2 started from  $\mathbf{o}_2$ . In the TRN session, we repeatedly exposed the participants to the  
visuomotor rotation (as detailed in Eq 13) for three sets of 60 trials with the same  
initial and target orientations as in BL1. The TFR session was similar to BL2: we  
abruptly removed the perturbation while testing whether the learning of the  
perturbation was transferred to a different initial orientation. We provided participants

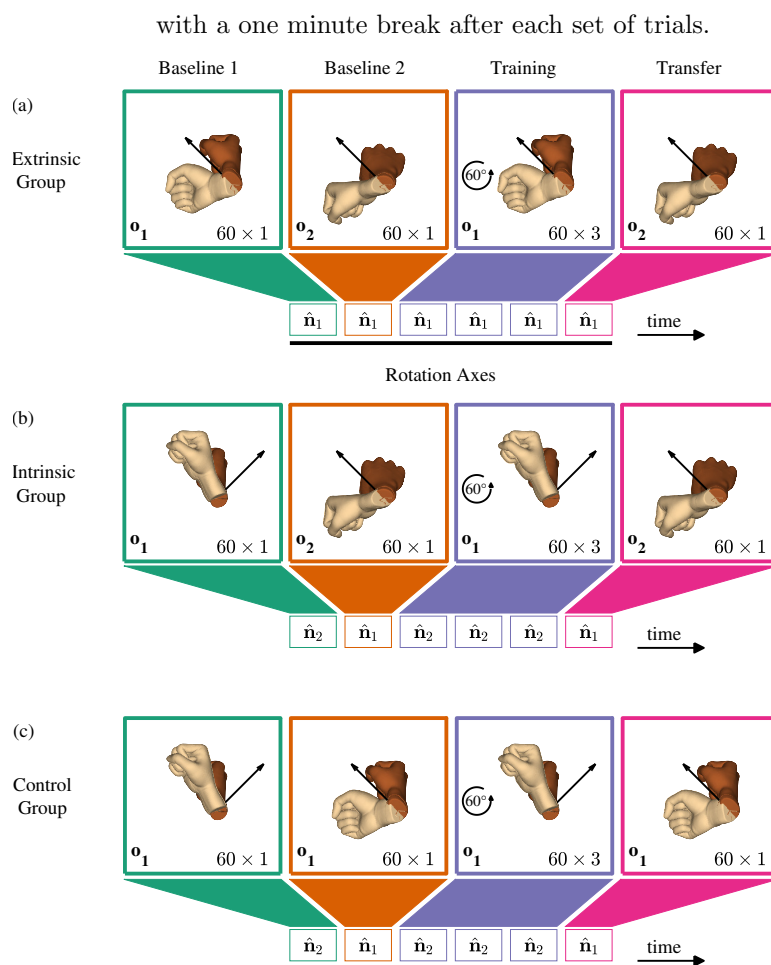

**Fig 3. Experimental design and participants groups - experiment 2.** All participants performed two sets of 60 baseline trials, three sets of 60 training trials, in which the cursor's rotation was perturbed by  $60^\circ$  around  $\hat{\mathbf{i}}$ , and one set of 60 transfer trials, in which the perturbation was removed. The black rotation axes are drawn with respect to an extrinsic reference frame. The initial cursor and target orientations in each set of trials are represented by the dark and light hands, respectively. The colors represent different sessions of BL (BL1 - green, BL2 - orange), TRN (blue) and TFR (pink). (a) Participants in the Extrinsic group performed all rotations towards similar targets in extrinsic coordinates - we rotated the initial orientation by  $50^\circ$  around  $\hat{\mathbf{n}}_1 = -\hat{\mathbf{j}}/\sqrt{2} + \hat{\mathbf{k}}/\sqrt{2}$  (in extrinsic coordinates). (b) Participants in the Intrinsic group performed all rotations towards similar targets in intrinsic coordinates - we rotated the initial orientation by  $50^\circ$  around  $\hat{\mathbf{n}}_2 = \hat{\mathbf{j}}/\sqrt{2} + \hat{\mathbf{k}}/\sqrt{2}$  (in intrinsic coordinates). In both groups, trials in BL1 and TRN started from  $\mathbf{o}_1$ , and trials in BL2 and TFR started from  $\mathbf{o}_2$ . (c) To remove the effect of initial hand orientation, participants in the Control group started all rotations from  $\mathbf{o}_1$ . The targets in BL1 and TRN were similar to those in BL1 of the Intrinsic group, and the targets in BL2 and TFR were similar to those in BL1 of the Extrinsic group.

To test in which coordinate system the visuomotor rotation was represented, we planned two groups of ten participants: Extrinsic and Intrinsic. In the Extrinsic group, all targets were identical in extrinsic coordinates - we rotated the initial cursor orientation by  $50^\circ$  around  $\hat{\mathbf{n}}_1 = -\hat{\mathbf{j}}/\sqrt{2} + \hat{\mathbf{k}}/\sqrt{2}$  using Eq 3 (Fig 3a). In the Intrinsic group, all targets were identical in intrinsic coordinates - we rotated the initial cursor

orientation by  $50^\circ$  around  $\hat{\mathbf{n}}_2 = \hat{\mathbf{j}}/\sqrt{2} + \hat{\mathbf{k}}/\sqrt{2}$  using Eq 4 (Fig 3b). One can imagine an  
extrinsic coordinate system by fixing it on the shoulder, and an intrinsic coordinate  
system by placing it on the wrist, which rotates as a function of the angles of the joints.  
The relation between the extrinsic and intrinsic coordinate systems is the hand's inverse  
kinematics, which maps the position and the orientation of the wrist to the angles of the  
hand's joints. Therefore, if one learns in an intrinsic coordinate system, it could be  
attributed to learning a new joint configuration. In contrast, if one learns in an extrinsic  
coordinate system, it could be attributed to learning a new rotation axis in visual  
coordinates. We chose the target orientations such that the ideal rotation axes (i.e., the  
axes used when following a geodesic) would be orthogonal between the two groups in  
BL1 and TRN, but identical in BL2 and TFR. Therefore, a difference between groups in  
the transfer of adaptation to an orthogonal initial orientation could be associated with  
the coordinates in which the perturbation was learned.

To reveal the coordinate system in which the visuomotor rotation was learned, we  
rotated the initial hand orientation by  $90^\circ$  around  $\hat{\mathbf{i}}$  and tested for transfer of adaptation  
in each group. However, the ability to separate between the two coordinates requires  
that the generalization of the perturbation to different directions would be sufficiently  
narrow. For instance, a wide generalization could cause a false pretense - upon removal  
of the perturbation, we would observe similar rotations in both groups, but this could  
be attributed to transfer of adaptation to an orthogonal initial hand orientation in one  
group and to generalization of adaptation to an orthogonal direction in the other  
group [22]. Therefore, we planned a control group of ten participants to test to what  
extent the adaptation generalizes to an orthogonal direction without changing the initial  
orientation (Fig 3c).

The hypotheses for the expected hand rotation in each one of the learning  
coordinates are depicted in Fig 4. Following two baselines, participants were trained  
with the perturbation. A possible way to compensate for the visuomotor rotation is to  
rotate the hand around an axis rotated by the inverse of the visuomotor rotation (Fig 4,  
Last Training). If the perturbation was learned and generalized to an orthogonal initial  
hand orientation, it is expected to be transferred in at least one of the learning  
coordinates (Fig 4, Early Transfer), followed by a full washout (Fig 4, Last Transfer).

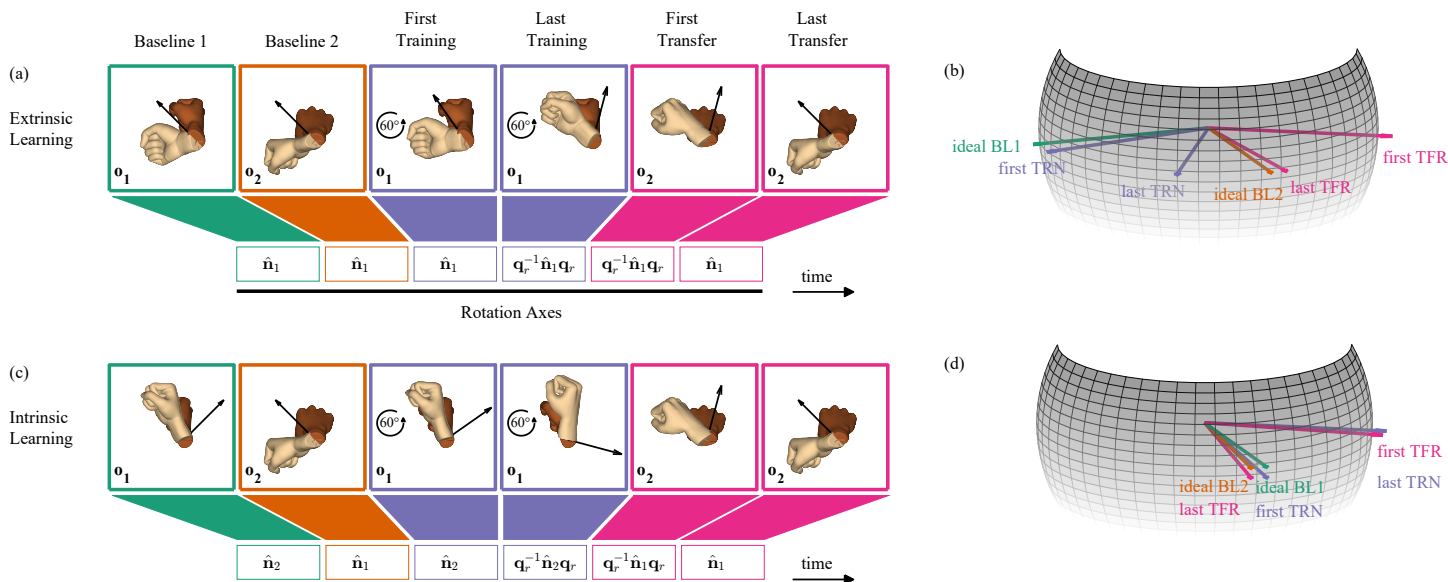

**Fig 4. Hypotheses of learning and generalization of a visuomotor rotation – the case of orientation matching.** The dark and light hands represent the expected initial and final orientations of the hand, respectively. The black rotation axes are drawn with respect to an extrinsic reference frame. The colors are as in Fig 3. If participants adapt to the visuomotor rotation while training, their aim is expected to gradually deviate from the ideal BL1 axis in the direction opposite to that of the perturbation. If participants transfer the perturbation across orthogonal initial orientations, their aim is expected to deviate in the same direction from the ideal BL2 axis in the first transfer trial. (a)-(b) Extrinsic learning hypothesis - transfer of learning of an extrinsically represented axis. (c)-(d) Intrinsic learning hypothesis - transfer of learning of an intrinsically represented axis. The spheres present the hypotheses regarding the hand rotation axis in an intrinsic reference frame at each key trial. The first TRN axis may deviate from the ideal BL1 axis due to corrections. Axes which are ideally equal, such as the ideal BL1 and ideal BL2 axes in (d), were separated for better visualization.

## Data analysis

We recorded the orientations of the handle of the robotic manipulator as rotation matrices at 1 [kHz]. To account for small changes in the sampling rate, we resampled the rotation matrices to a constant 1 [kHz] sampling rate using spherical linear interpolation. Then, we downsampled the matrices to 100 [Hz] and transformed them into quaternions. We computed the angular velocity from the quaternion trajectories and low-pass filtered it at 6 [Hz] with a 4<sup>th</sup> order zero-lag Butterworth filter using the *filtfilt* function in MATLAB (The MathWorks, Natick, Massachusetts, USA).

We removed trials from the analysis if the participant failed to follow the instructions of the task; for example, trials in which participants used their left hand to correct or support the right hand were removed. Other examples include grasping the handle incorrectly, letting go of the handle and looking away from the three-dimensional viewer.

## Experiment 1

A total of 37 trials were removed (0.69%), with a maximum of 9 trials per participant (2.34%). We analyzed each trial from the first time stamp in which the angular speed of the hand passed 10% of its maximum until the time stamp in which the cursor-to-target angular distance decreased below 15° for a period of 400 [ms]. We computed the QGS of each trial using Eq 11.

## Experiment 2

A total of 35 trials were removed (0.32%), with a maximum of 8 trials per participant (2.22%). Based on the first experiment, we knew that people tend to follow a geodesic in  $\mathbb{H}_1$  when asked to reorient a cursor to match a target. Therefore, we were able to quantify a single rotation aiming axis at the time of peak angular speed. We considered the trial initiation time to be the first time stamp in which the angular speed exceeded 10% of its maximum. Let  $\{\mathbf{q}_i\}_{i=1}^N$  be a discrete time,  $N$ -sample orientation trajectory of the handle of the robotic manipulator, where  $\mathbf{q}_i = \cos \theta_i/2 + \hat{\mathbf{n}}_i \sin \theta_i/2$ . First, to have the initial orientation equal to  $\mathbf{q}_1$ , we rotated each quaternion sample by  $\mathbf{q}_1^{-1}$  (see Mathematical formulation section). Then, we defined the aiming axis in each trial:

$$\hat{\mathbf{n}}_a = \arg \max_{\hat{\mathbf{n}} \in \mathbb{R}^3} \|\omega\|, \quad (17)$$

where  $\omega$  is the angular velocity of the hand.

To reduce the variability between participants, for each participant we removed the baseline of the set of aiming axes. To account for the three-dimensional information of the data, we removed the baseline on the sphere as follows. First, we defined the baseline axis, denoted by  $\langle \hat{\mathbf{n}}_a \rangle$ , as the average over the aiming axes of 20 randomly chosen trials out of the last 40 trials in each BL set (their normalized sum). Then, we removed the baseline by rotating all aiming axes by the rotation that brings the baseline axis to the ideal rotation axis ( $\hat{\mathbf{n}}_{id}$ ), i.e., all aiming axes were rotated by an angle  $\arccos(\langle \hat{\mathbf{n}}_a \rangle \cdot \hat{\mathbf{n}}_{id})$  around an axis  $\frac{\langle \hat{\mathbf{n}}_a \rangle \times \hat{\mathbf{n}}_{id}}{\|\langle \hat{\mathbf{n}}_a \rangle \times \hat{\mathbf{n}}_{id}\|}$ .

In addition to the spherical data analysis, we quantified the aiming angle - a scalar value that estimates the direction of rotation. We defined it as the elevation angle of the aiming axis from a plane spanned by the perturbation axis ( $\hat{\mathbf{n}}_r$ ) and the ideal rotation



axis ( $\hat{\mathbf{n}}_{id}$ ); the latter is different between different experimental sessions: 425

$$\text{Aiming angle} = \arctan 2 \left( \hat{\mathbf{n}}_a \cdot (\hat{\mathbf{n}}_r \times \hat{\mathbf{n}}_{id}), \sqrt{(\hat{\mathbf{n}}_a \cdot \hat{\mathbf{n}}_r)^2 + (\hat{\mathbf{n}}_a \cdot \hat{\mathbf{n}}_{id})^2} \right). \quad (18)$$

The aiming angle spans between  $-\pi/2$  and  $\pi/2$ , and it is zero when  $\hat{\mathbf{n}}_a = \hat{\mathbf{n}}_{id}$ . This is 426  
similar to the aiming angle in studies of two-dimensional translations, that is, the 427  
angular distance between the aiming axis and the straight line that connects between 428  
the initial position and the target. 429

## Statistical analysis 430

### Experiment 1 431

The statistical analyses were performed using a custom-written MATLAB code. We 432  
used bootstrap to compute the 95% confidence interval (CI) for the median QGS of 433  
each participant. The median was chosen as the parameter for central tendency since 434  
the scores are skewed (a normal distribution was rejected using Lilliefors test with  $p =$  435  
0.001). In the orientation matching task, we considered a deviation from the minimal 436  
angular displacement required to match the cursor to the target to be small if it was 437  
less than  $10^\circ$ . Therefore, since the average angular displacement between the initial 438  
cursor and target orientations was  $50^\circ$ , we considered a rotation as geodetic enough if its 439  
QGS was less than 1.2. 440

To determine significant effects of trial conditions on the QGS, we conducted a 441  
six-way repeated measures ANOVA test with the QGS as the response variable - one 442  
between the participants' factor of the group (Mixed cond., Separate cond.) and five 443  
within the participants' factors of initial hand orientation ( $\mathbf{o}_1, \mathbf{o}_2$ ), target orientation 444  
( $\mathbf{t}_1, \mathbf{t}_2$ ), axis coordinate system (extrinsic, intrinsic), axis alignment (aligned, 445  
misaligned) and rotation axis (see Table 1). We checked for the main effect, as well as 446  
for first order interactions. Prior to the analysis, the scores were transformed using 447  
 $\log_{10}$  to reduce deviation from normality. Significant effects were defined as those with a 448  
probability level of  $p < 0.05$ . The effect size is reported using partial eta-squared ( $\eta_p^2$ ) 449  
for the ANOVA test. Since none of the factors were found to be significant, we did not 450  
apply further multiple comparisons within and between factors. 451

## Experiment 2

We used two statistical approaches to quantify learning and generalization effects. In both approaches we analyzed single trials, including the last BL1 and BL2 trials (60 and 120), the first and last TRN trials (121 and 300), and the first and last TFR trials (301 and 360). We analyzed single trials (instead of average over a sequence of trials) to avoid missing effects of learning, since a visual examination of the adaptation curves implied that the learning was fast. To test for the effect of first exposure to the perturbation, we compared between the last BL1 and first TRN trials (60 and 121). To test if the participants fully adapted to the perturbation, we compared between the last BL1 and last TRN trials (60 and 300). To quantify the extent of adaptation, we compared between the first and last TRN trials (121 and 300). To test for transfer of adaptation, we compared between the last BL2 and first TFR trials (120 and 301). To test if the transfer was fully washed out, we compared between the last BL2 and last TFR trials (120 and 360), as well as the first and last TFR trials (301 and 360). Then, we compared within key trials between groups. We tested for differences in the first TRN trial (trial 121) and the last TRN trial (trial 300). Furthermore, to reveal the coordinates of learning, we compared between groups, and specifically between the Intrinsic and Extrinsic groups in the first TFR trial (trial 301). When comparing the first transfer behaviour between groups, we performed another analysis - we averaged over the first three TFR trials of each participant to be able to reduce effects that vanish fast. Lastly, we tested for differences in the last TFR trial (trial 360). Significant effects were defined as those with a probability level of  $p < 0.05$ .

In the spherical data analysis, we used the 'Directional' package in R [46] to analyze differences in the baseline corrected aiming axes. We assumed that the axes are sampled from a symmetric distribution around a mean direction ( $\mu$ ) with a concentration parameter ( $\kappa$ ). To test for the equality of mean directions of two samples of aiming axes, we used a non-equal concentration parameters approach for a one-way spherical ANOVA test. Additionally, to test whether an axis could be considered the mean of a sample, we used a log-likelihood ratio test with bootstrap calibration.

In the scalar aiming angle analysis, we quantified adaptation and transfer of learning by comparing aiming angles of the six key trials. The aiming angle is a non-periodic

scalar variable that does not require any spherical treatment. Therefore, we performed a two-way mixed model repeated measures ANOVA test with the aiming angle as the response variable, one between the participants' factor of the group (Extrinsic, Intrinsic, Control) and one within the participants' factor of the trial (60, 120, 121, 300, 301, 360). When significant effects were found, we performed the planned comparisons using a t test with Bonferroni's correction. The effect size is reported using partial eta-squared ( $\eta_p^2$ ) for the ANOVA test and Cohen's d for all t tests.

## Results

### Experiment 1

In the orientation-matching experiment, we studied whether participants performed geodetic hand rotations in quaternion space. Participants were requested to match the orientation of a three-dimensional virtual cursor to that of an oriented target using a robotic handle. We quantified the geodeticity of the movement using the QGS. Fig 5 depicts the results of two trials with the same initial cursor orientation and target orientation - one geodetic rotation (Fig 5a) and one non-geodetic rotation (Fig 5b). Presented are the paths of an intrinsic reference frame that is attached to the robotic handle, the angular velocity profiles used to follow these paths, and the instantaneous axis paths ( $\hat{n}^\delta$ ). In the intrinsic frame path, the circles enclose caps with angular apertures of  $5^\circ$  and  $15^\circ$  that define the accepted range for the hand's orientations at the initiation and the termination of the movement (see the Procedure and protocol section for details). While both participants matched the cursor to the target with sufficient proximity, the geodesic (QGS = 1.08) followed a shorter path compared to the non-geodesic (QGS = 4.2), rotated more smoothly and its instantaneous axis varied less.

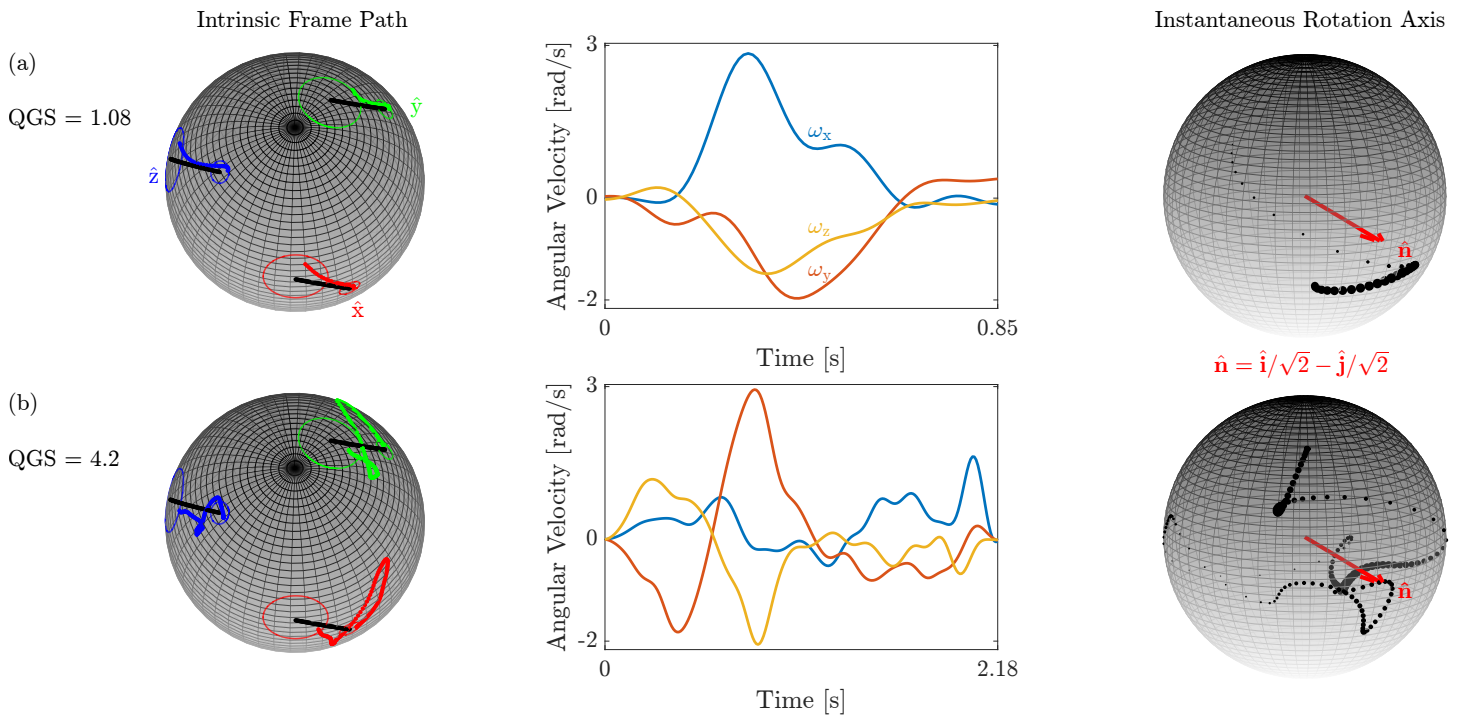

507

**Fig 5. Examples of a geodesic and a non-geodesic.** The left column shows the path of the intrinsic reference frame that is attached to the robotic handle ( $\hat{x}$  - red,  $\hat{y}$  - green and  $\hat{z}$  - blue). The circles enclose caps that define the accepted range for the hand's orientation at the initiation of the movement (small cap with angular aperture of  $5^\circ$ ) and at its termination (large cap with angular aperture of  $15^\circ$ ). The black curves describe the geodesic between the initial cursor orientation and the target orientation. The middle column shows the angular velocity profile used to follow the orientation path and the right column describes the path of the instantaneous rotation axis as black dots. To emphasize fast segments, the size of the black dots is scaled in proportion to the angular speed. The ideal rotation axis is shown in red. (a) The trajectory of the intrinsic frame of a geodesic follows a short path on the sphere and is characterized by a smooth angular velocity profile and a concentrated instantaneous axis path. (b) The trajectory of the intrinsic frame of a non-geodesic follows a longer path on the sphere compared to that of the geodesic and is characterized by a fragmented angular velocity profile and a dispersed instantaneous axis path. In both examples, the initial cursor orientations and the target orientations were identical.

**Participants tended to follow a geodesic in quaternion space.** The median 508  
 was chosen to account for the central tendency of the QGS since it is skewed (skewness 509  
 = 4.57, bootstrap 95% CI = [3.16, 6.32]). When asked to match the orientation of the 510  
 cursor to the target, most of the participants performed geodesic rotations in most of 511  
 the trials (Fig 6), i.e., their movements mostly resembled Fig 5a rather than Fig 5b. 512  
 Only four participants had scores with a median 95% CI above the 1.2 threshold that 513  
 we set for geodesics. Out of the rest, the CIs of eight participants fell below 1.2, as they 514  
 mostly performed geodesic rotations and the CIs of two were inconclusive. The fact that 515  
 most rotations followed geodesics suggests that hand rotations are centrally controlled, 516

similarly to translations, possibly by optimizing geometrical properties of the orientation path. Yet, this control may not be perfect, as indicated by the large variability of the QGS, as opposed to low variability observed in planar reaching [36].

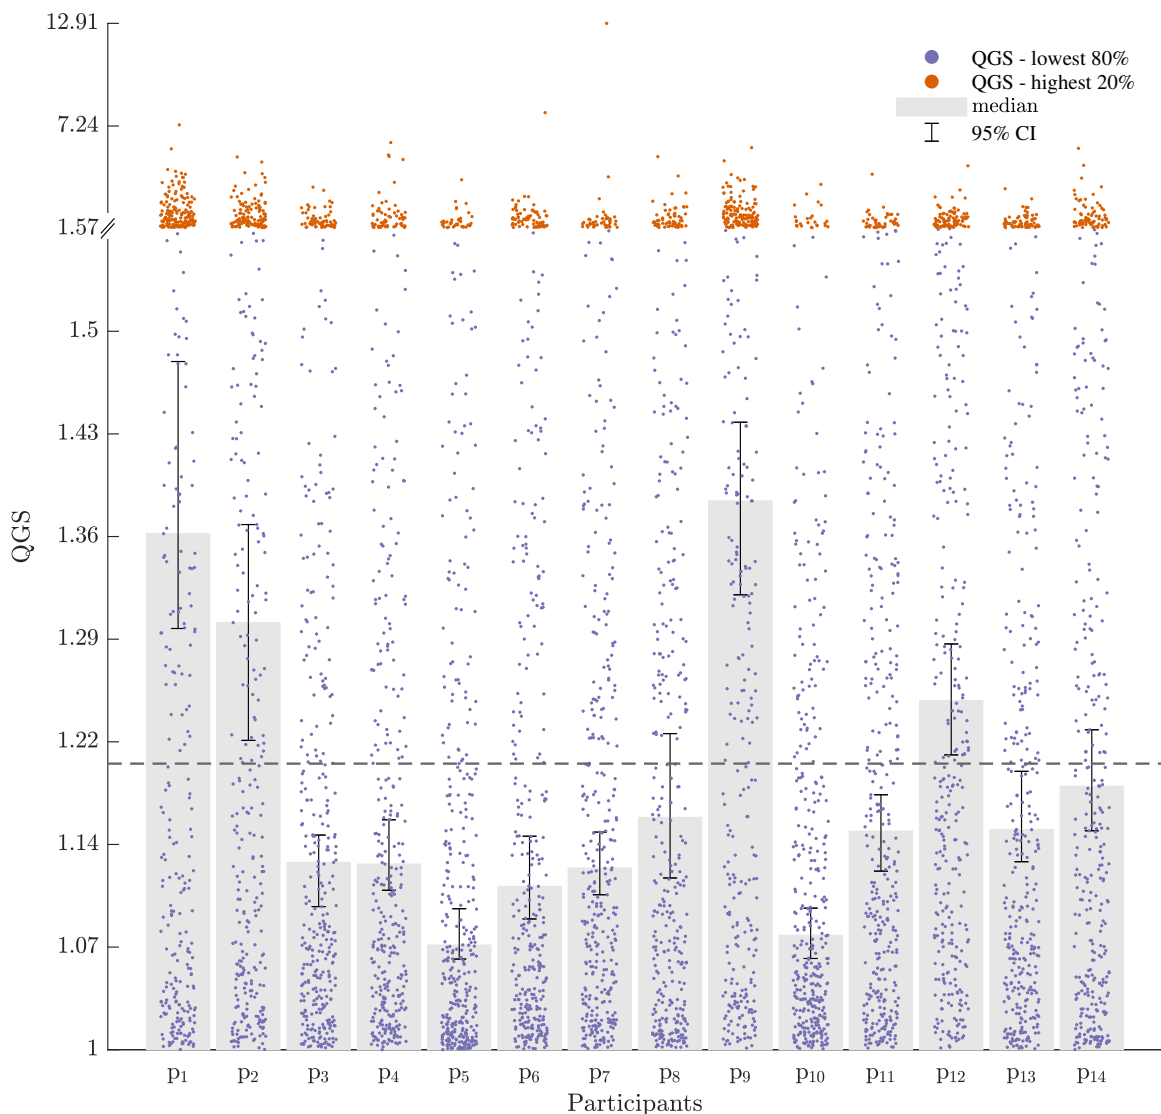

**Fig 6. Median QGS and 95% bootstrap CI.** Most of the participants performed geodetic hand rotations as indicated by the low 95% CI of the median QGS for eight of the fourteen participants (p<sub>3</sub> - p<sub>7</sub>, p<sub>10</sub>, p<sub>11</sub> and p<sub>13</sub>). Yet, four participants deviated largely from geodesics (p<sub>1</sub>, p<sub>2</sub>, p<sub>9</sub> and p<sub>12</sub>), while the rest gave indecisive results (p<sub>8</sub> and p<sub>14</sub>). For visualization purpose, the lowest 80% of all scores are scattered in blue along 80% of the vertical axis, and the highest 20% of all scores are scattered in orange along the remaining 20% of the vertical axis. While both ranges are linearly scaled, the gap between values is different. The gray bars start from QGS = 1 (the lower range of the region of interest), and end at the median of the scores of all trials for each participant. The error bars mark the bootstrap 95% CI for the median. The dashed gray line at QGS = 1.2 is the upper limit of the region of interest.

**The QGS is robust to changes in the conditions of the task.** A six-way 521  
repeated measures ANOVA test was used to find significant effects of the experimental 522  
factors on the  $\log_{10}$ -transformed QGS. The statistical analysis did not reveal a 523  
significant main effect of the group ( $F_{1,1} = 0.96$ ,  $p = 0.51$ ,  $\eta_p^2 = 0.49$ ), the initial hand 524  
orientation ( $F_{2,2} = 0.88$ ,  $p = 0.53$ ,  $\eta_p^2 = 0.47$ ), the target orientation ( $F_{2,2} = 16.97$ ,  $p =$  525  
 $0.06$ ,  $\eta_p^2 = 0.94$ ), the alignment ( $F_{1,1} = 0.11$ ,  $p = 0.79$ ,  $\eta_p^2 = 0.1$ ), the axis coordinate 526  
system ( $F_{1,1} = 3.17$ ,  $p = 0.33$ ,  $\eta_p^2 = 0.76$ ), and the rotation axis ( $F_{5,5} = 1.71$ ,  $p = 0.29$ , 527  
 $\eta_p^2 = 0.63$ ). Additionally, we did not find significant effects of the interaction between 528  
the group and the initial hand orientation ( $F_{2,2} = 3.52$ ,  $p = 0.22$ ,  $\eta_p^2 = 0.78$ ), the group 529  
and the target orientation ( $F_{2,2} = 0.14$ ,  $p = 0.88$ ,  $\eta_p^2 = 0.12$ ), the group and the 530  
alignment ( $F_{1,1} = 0.31$ ,  $p = 0.68$ ,  $\eta_p^2 = 0.23$ ), the group and the axis coordinate system 531  
( $F_{1,1} = 0.06$ ,  $p = 0.84$ ,  $\eta_p^2 = 0.06$ ), and the group and the rotation axis ( $F_{5,5} = 1.03$ ,  $p$  532  
 $= 0.49$ ,  $\eta_p^2 = 0.51$ ). The fact that the QGS was not affected by any of these factors 533  
suggests that it reflects a robust motor invariant that is controlled by the sensorimotor 534  
system. Moreover, the lack of strong reliance of the QGS on the alignment with either 535  
intrinsic or extrinsic reference frames does not suggest that the orientation of a rigid 536  
body is centrally represented using Euler angles. 537

## Experiment 2 538

In the visuomotor rotation adaptation experiment, we studied adaptation and 539  
generalization of a visual perturbation applied to the rotation of the cursor during an 540  
orientation-matching task. Following two baseline sets with veridical visual feedback 541  
and orthogonal initial hand orientations, participants were exposed to a remapping of 542  
the rotation of their hand by a  $60^\circ$  rotation. Then, by removing the perturbation and 543  
changing the initial hand orientation, we tested if participants learned in extrinsic or 544  
intrinsic coordinates. Fig 7 depicts the aiming axes and angles of an individual 545  
participant in the Extrinsic group. The participant had adapted by the end of the TRN 546  
session and transferred this adaptation to the orthogonal initial orientation when the 547  
perturbation was removed (Fig 7c-d). In the remainder of this section, all aiming axes 548  
are written and drawn in an intrinsic reference frame. 549

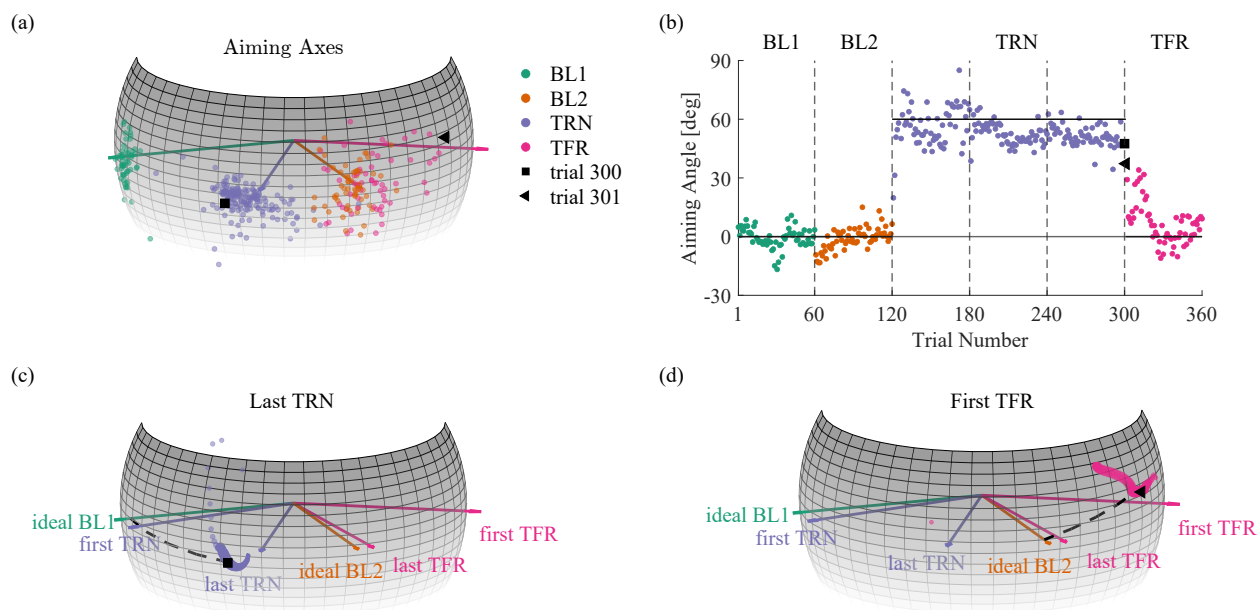

**Fig 7. Aiming axes and angles of a single participant in the Extrinsic group.** The colors are as in Fig 3. (a) The course of the aiming axes. The last TRN axis and the first TFR axis are marked as a square and a triangle, respectively. (b) The time course of the aiming angles. The dashed lines separate between the different sets of trials, and the continuous lines indicate the ideal aiming angle at the BL sessions and the aiming angle required for full adaptation at the TRN session. (c) The rotation axes of the quaternion path in the last TRN trial. The extent of adaptation is the length of the arc that connects between the ideal BL1 axis and the aiming axis (square). (d) The rotation axes of the quaternion path in the first TFR trial. The extent of transfer is the length of the arc that connects between the ideal BL2 axis and the aiming axis (triangle). To emphasize fast rotation samples, the size of the dots is scaled in proportion to the angular speed in (c) and (d).

550

**Participants partially adapted to the perturbation.** Fig 8 depicts the course of the aiming axes and the time course of the aiming angles averaged across the ten participants in each group. To check for the effect of the initial exposure to the perturbation, we compared the aiming axes of the last BL1 trial with that of the first TRN trial (Fig 8a). Since the aiming axis does not reflect an error, we did not expect it to immediately change. Nevertheless, since we provided participants with continuous visual feedback, the appearance of the perturbation could have caused them to correct their movement, rather than rotate along a geodesic, which affects the aiming axis. In the Intrinsic and Control groups, we did not find a significant difference (Intrinsic:  $\chi^2_2 = 1.3$ ,  $p = 0.52$ , Control:  $\chi^2_2 = 1.2$ ,  $p = 0.55$ ). On the other hand, the initial exposure to the perturbation in the Extrinsic group caused a deviation from the last BL1 aiming axis, possibly due to corrections ( $\chi^2_2 = 17.9$ ,  $p < 0.001$ ). Another way to test the effect of the initial exposure is to check whether the ideal BL1 axis could be considered as the



mean of the aiming axes in the first TRN trial. In accordance with the former result, we did not reject this hypothesis in the Intrinsic and Control groups, but we did reject it in the Extrinsic group (Extrinsic:  $\mu = 0.09\hat{\mathbf{i}} - 0.41\hat{\mathbf{j}} + 0.91\hat{\mathbf{k}}$ ,  $\kappa = 33$ ,  $p = 0.01$ , Intrinsic:  $\mu = -0.11\hat{\mathbf{i}} + 0.72\hat{\mathbf{j}} + 0.68\hat{\mathbf{k}}$ ,  $\kappa = 6.64$ ,  $p = 0.636$ , Control:  $\mu = -0.05\hat{\mathbf{i}} + 0.68\hat{\mathbf{j}} + 0.73\hat{\mathbf{k}}$ ,  $\kappa = 9.58$ ,  $p = 0.86$ ). Therefore, we conclude that the participants mostly did not adapt in their first trial with the visuomotor rotation as expected, although some showed signs of correction attempts.

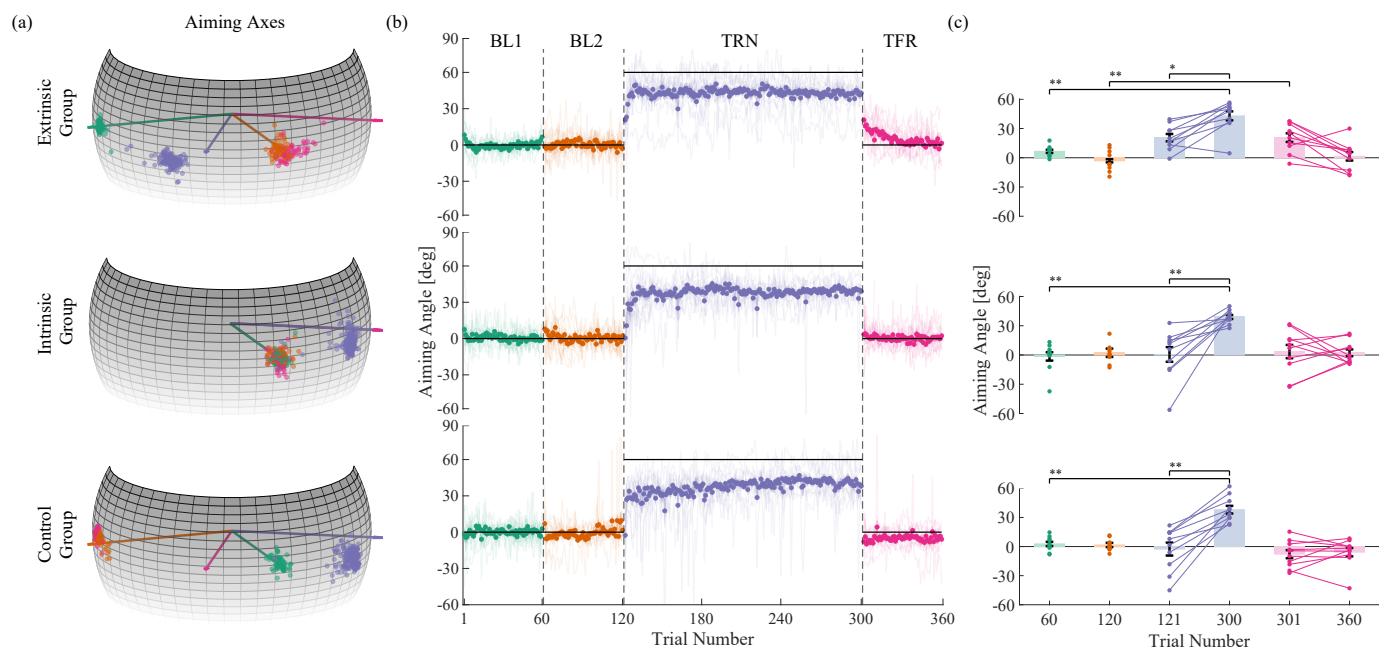

**Fig 8. Average aiming axes and angles of all groups in experiment 2.** The average aiming axes are consistent with a representation of the partially learned perturbation in extrinsic coordinates and with a narrow generalization to different targets. The colors are as in Fig 3. (a) The course of the aiming axes (dots) averaged over participants in each group, and the ideal axis (arrows) in each session. (b) The time course of the aiming angles (dots) averaged over participants and standard error (dark shading) in each group. The light curves show the time courses of the aiming angles of each participant. The dashed lines separate between the different sets of trials. (c) The aiming angles of all participants (dots) in each of the key trials (60, 120, 121, 300, 301, 360). The bars and error bars are the mean  $\pm$  standard error. \* $p < 0.05$ , \*\* $p < 0.001$ .

To check if the participants adapted, we tested whether and how they changed the aiming axis from the first to the last TRN trials (Fig 8a). In motor learning of visuomotor rotation, adaptation is often associated with movement in the direction opposite to the direction of the perturbation. Accordingly, we observed a similar effect that indicates adaptation (Extrinsic:  $\chi^2_2 = 24.69$ ,  $p < 0.001$ , Intrinsic:  $\chi^2_2 = 24.13$ ,  $p < 0.001$ , Control:  $\chi^2_2 = 33.97$ ,  $p < 0.001$ ).



Yet, the participants did not fully adapt. To show that, we rotated the aiming axes of the last BL1 trial by  $-60^\circ$  around the perturbation axis ( $\hat{\mathbf{i}}$ ) and found that they were significantly different from those of the last TRN trial (Extrinsic:  $\chi_2^2 = 42.27$ ,  $p < 0.001$ , Intrinsic:  $\chi_2^2 = 23.23$ ,  $p < 0.001$ , Control:  $\chi_2^2 = 37.7$ ,  $p < 0.001$ ). Moreover, we rejected the hypothesis that the mean of the aiming axes in the last TRN trial is the ideal BL1 axis rotated  $-60^\circ$  around  $\hat{\mathbf{i}}$  (Extrinsic:  $\boldsymbol{\mu} = 0.13\hat{\mathbf{i}} - 0.02\hat{\mathbf{j}} + 0.99\hat{\mathbf{k}}$ ,  $\kappa = 31.22$ ,  $p = 0.04$ , Intrinsic:  $\boldsymbol{\mu} = 0.1\hat{\mathbf{i}} + 0.99\hat{\mathbf{j}} + 0.09\hat{\mathbf{k}}$ ,  $\kappa = 53.79$ ,  $p = 0.001$ , Control:  $\boldsymbol{\mu} = 0.08\hat{\mathbf{i}} + 0.99\hat{\mathbf{j}} + 0.11\hat{\mathbf{k}}$ ,  $\kappa = 29.61$ ,  $p = 0.01$ ). In fact, by the end of the TRN session, participants in the Extrinsic group rotated on average around an axis near the flexion-extension axis ( $\hat{\mathbf{k}}$ ), while participants in the Intrinsic and Control groups rotated on average around an axis near the radial-ulnar axis ( $\hat{\mathbf{j}}$ ). This  $\sim 90^\circ$  difference in the aiming axes between the Extrinsic group and the Intrinsic and Control groups is expected because the initial orientations were orthogonal as well.

**The perturbation was generalized to an orthogonal initial hand orientation when participants trained and transferred towards the same target in extrinsic coordinates.** To check for the generalization of the perturbation, we changed the initial orientation of the hand in the Extrinsic and Intrinsic groups and removed the perturbation. We designed the TFR trials such that participants in both groups were instructed to perform the task from the same initial orientation towards the same target. Thus, a different behaviour upon removal of the perturbation could reveal the coordinates in which the perturbation was represented in the process of adaptation. To check whether the adaptation was transferred, we compared the aiming axes in the last BL2 trial and the first TFR trial. If participants did transfer the adaptation to some extent, then upon removal of the perturbation we expected them to change their aiming axis compared to the last BL2 trial in the direction opposite to the direction of the perturbation. This was indeed the case for participants in the Extrinsic group, which showed a clear significant transfer (Fig 8a, top,  $\chi_2^2 = 38.12$ ,  $p < 0.001$ ), as opposed to participants in the Intrinsic group (Fig 8a, middle,  $\chi_2^2 = 0.83$ ,  $p = 0.66$ ). Accordingly, we rejected the possibility that the ideal axis of BL2 is the mean of the aiming axes in the first TFR trial in the Extrinsic group, but we did not reject it in the Intrinsic group (Extrinsic:  $\boldsymbol{\mu} = -0.04\hat{\mathbf{i}} + 0.93\hat{\mathbf{j}} + 0.36\hat{\mathbf{k}}$ ,  $\kappa = 35.22$ ,  $p = 0.002$ , Intrinsic:  $\boldsymbol{\mu} = -0.04\hat{\mathbf{i}} + 0.8\hat{\mathbf{j}} + 0.6\hat{\mathbf{k}}$ ,  $\kappa = 11.56$ ,  $p = 0.38$ ). This result indicates that, on average,

the adaptation was represented in extrinsic, rather than intrinsic, coordinates. 610

However, participants in the Extrinsic group did not transfer the full extent of 611  
adaptation, as indicated by the comparison of the aiming axes in the first TFR trial 612  
with those of the last TRN trial rotated  $-90^\circ$  around  $\hat{\mathbf{i}}$  ( $\chi^2_2 = 22.35$ ,  $p < 0.001$ ). This was 613  
somewhat unexpected. Indeed, we did not expect to see a complete  $60^\circ$  transfer, but we 614  
did expect to see the full extent of adaptation transferred. 615

Following the first TFR trial, the participants in the Extrinsic group gradually 616  
reversed their aiming axis until the last TFR trial ( $\chi^2_2 = 23.25$ ,  $p < 0.001$ ). In fact, they 617  
regained BL2 behaviour, as indicated by a comparison of the aiming axes in the last 618  
BL2 trial and last TFR trial ( $\chi^2_2 = 1.11$ ,  $p = 0.57$ ). Moreover, the mean of the aiming 619  
axes in the last TFR trial could indeed be the ideal BL2 axis ( $\boldsymbol{\mu} = 0.03\hat{\mathbf{i}} + 0.72\hat{\mathbf{j}} +$  620  
 $0.69\hat{\mathbf{k}}$ ,  $\kappa = 29.22$ ,  $p = 0.74$ ). Interestingly, it took participants more trials to regain BL2 621  
behavior during TFR than to adapt during TRN. As expected, participants in the 622  
Intrinsic group did not significantly change their aiming axis throughout the TFR 623  
session ( $\chi^2_2 = 2.13$ ,  $p = 0.34$ ). By the end of the TFR session, the participants aimed 624  
near the ideal axis of BL2, as it did not significantly differ from the mean of their 625  
aiming axes ( $\boldsymbol{\mu} = 0.09\hat{\mathbf{i}} + 0.73\hat{\mathbf{j}} + 0.68\hat{\mathbf{k}}$ ,  $\kappa = 39.32$ ,  $p = 0.22$ ). 626

**The perturbation was not generalized to an orthogonal target starting** 627  
**from the same initial orientation.** Our ability to determine whether the 628  
representation is consistent with one coordinate system rather than another relied on 629  
the fact that the generalization of the perturbation to other target directions was 630  
narrow enough. For that reason, the control group was set to determine the extent of 631  
generalization starting from a single initial orientation. We did not observe an 632  
aftereffect of adaptation to an orthogonal target (Fig 8a, bottom). Surprisingly, we 633  
observed a slight difference in the aiming axis between the last BL2 trial and the first 634  
TFR trial in the direction of the perturbation ( $\chi^2_2 = 5.56$ ,  $p = 0.06$ ). That said, the 635  
ideal BL2 axis did not significantly differ from the mean of aiming axes in the first TFR 636  
trial ( $\boldsymbol{\mu} = -0.01\hat{\mathbf{i}} - 0.8\hat{\mathbf{j}} + 0.6\hat{\mathbf{k}}$ ,  $\kappa = 22.84$ ,  $p = 0.19$ ). Additionally, no change was 637  
observed throughout the TFR session ( $\chi^2_2 = 0.52$ ,  $p = 0.77$ ). This result characterizes 638  
the visuomotor rotation as having a narrow generalization to different target directions. 639

**The groups differed only in the transfer behavior.** To check for differences 640  
between groups, we tested whether participants from different groups aimed differently 641

in key trials. Since the targets in sessions of different groups were orthogonal, and in order to be able to compare the aiming axes, we rotated the aiming axes in the BL1 and TRN trials of the Extrinsic group and the aiming axes in the BL2 and TFR trials of the Control group by  $-90^\circ$  around  $\hat{\mathbf{i}}$ . Participants in different groups responded differently to the initial exposure to the perturbation ( $\chi_4^2 = 16.84$ ,  $p = 0.002$ ), possibly due to correction attempts performed by some of the participants in the Extrinsic group (Extrinsic vs. Intrinsic:  $\chi_4^2 = 10.36$ ,  $p = 0.006$ , Extrinsic vs. Control:  $\chi_4^2 = 13.19$ ,  $p = 0.001$ , Intrinsic vs. Control:  $\chi_4^2 = 0.52$ ,  $p = 0.79$ ). Nevertheless, by the end of the TRN session, participants in all groups used similar strategies by adapting a new aiming axis ( $\chi_4^2 = 1.71$ ,  $p = 0.78$ ). In contrast, when the perturbation was removed and participants transferred to a new initial hand orientation, different groups utilized different strategies ( $\chi_4^2 = 39.36$ ,  $p < 0.001$ ). This is mainly due to the difference between participants in the Extrinsic and Control groups ( $\chi_2^2 = 39.16$ ,  $p < 0.001$ ), but also due to a non-significant, yet non-negligible, differences between participants in the Intrinsic and both the Extrinsic and Control groups (Intrinsic vs. Extrinsic:  $\chi_2^2 = 5.54$ ,  $p = 0.06$ , Intrinsic vs. Control:  $\chi_2^2 = 5.19$ ,  $p = 0.07$ ).

The lack of significant difference between the Extrinsic and Intrinsic groups is due to the small concentration of the aiming axes in the first TFR trial in the Intrinsic group ( $\kappa = 11.56$ ) compared to that of the Extrinsic group ( $\kappa = 35.22$ ). Furthermore, it implies that while some participants in the Intrinsic group did not show transfer of adaptation to either direction, others did, which suggests a possible model of learning in mixed coordinates. Nevertheless, this effect vanished fast. To show that, we averaged the aiming axes in the first three TFR trials of each participant and repeated the comparison, which yielded a clear distinction between the Extrinsic group and both the Intrinsic and Control groups (Extrinsic vs. Intrinsic:  $\chi_2^2 = 13.49$ ,  $p = 0.001$ , Extrinsic vs. Control:  $\chi_2^2 = 49.4$ ,  $p < 0.001$ , Intrinsic vs. Control:  $\chi_2^2 = 6.85$ ,  $p = 0.03$ ). By the end of the TFR session, no significant difference in the aiming axes was observed between groups ( $\chi_4^2 = 7.42$ ,  $p = 0.11$ ).

The analysis of the aiming angles (Fig 8b-c) is described in S1 Appendix A. Importantly, the analysis gave similar results in all statistical comparisons, which reinforces the results reported here.

## Discussion

In our first experiment, we presented a novel approach for the analysis of the orientation path of a manipulated virtual rigid body, and used it to quantify the geodicity of rotations in an orientation-matching task. By considering geodesics in  $\mathbb{H}_1$ , we showed that most of the participants tended to perform geodetic hand rotations. This means that they closely followed the great arc connecting the initial and final orientations of the hand. Nevertheless, a few participants performed non-geodetic orientation-matching movements, and the results of a few others were indecisive. The large variability within the participants and the small (but non-negligible) deviations from geodesics could be attributed to a few factors, including central planning. They could also be due to neuromuscular noise [36], as is evident from the dominance of stiffness in wrist rotation [35]. We also tested for the effect of task factors specifying the initial hand and target orientations. Our results indicated that manipulating these factors had only a small effect on the geodicity. Taken together, these results imply that the orientation of the hand is under kinematic control, yet the control is imperfect.

Our computational analysis design is based on the assumption that the nervous system represents the orientation of three-dimensional rigid bodies as quaternions. However, other representations are possible, such as Euler angles. The current experiment does not allow for differentiating between Euler angles and quaternion representations. We chose the quaternions because they provide a convenient computational framework that facilitates further studies, as we showed in the second experiment.

Previous studies that focused on the control of orientation investigated similar rotational movements, but most of them applied joint constraints [35–41]. In our orientation matching task, the participants were free to use all the degrees of freedom of their arm. In another study, the use of a mobile phone instead of a robotic device removed any joint constraint [42], yet it did not provide realistic three-dimensional visual feedback of the controlled phone. Instead, the orientation of the phone was projected onto the position of a point cursor. In contrast, we provided three-dimensional visual feedback. This made the task more natural, but also challenging to complete, as it required three-dimensional shape perception concurrent with object manipulation.

This added complexity may have increased the variability of the orientation paths. 704

In our second experiment we tested whether or not participants are capable of 705  
compensating for visual perturbation applied on their hand's rotation. We observed a 706  
fast, yet partial, adaptation in all the groups in the study. This was in contrast to what 707  
is known about adaptation to a visuomotor rotation with continuous visual feedback in 708  
point-to-point movements: the adaptation is typically fast [47], but it is usually almost 709  
fully compensated [8, 22]. Early works found hints of separate mechanisms for the 710  
control of orientation compared to translation [29, 30, 33, 48, 49], and our results provide 711  
additional support for the idea of separate control of orientation and translation. 712  
However, we set the performance error of success at 15°; thus it could be expected that 713  
participants would adapt to no more than 45°, which was indeed the case (see S1 714  
Appendix A for details). 715

Studies of planar translational movements have proposed that the adaptation 716  
process is composed of two components: implicit and explicit. An implicit process is an 717  
involuntary response to sensory prediction error [50] (i.e., the difference between the 718  
predicted and actual sensory outcome of a given motor command). An explicit process 719  
is an aware process in response to a performance error [18] (i.e., a signal that indicates 720  
task success or failure [51]) by deliberately re-aiming the hand such that it intentionally 721  
moves to a location that is distinct from the location of the target [52]. It was proposed 722  
that explicit processes are fast compared to implicit processes [53]. Adapting purely 723  
explicitly could explain the very fast, yet partial, adaptation that was observed in all 724  
the groups of our study. However, such an absence of an implicit process contradicts the 725  
establishment of an internal model used to counteract the perturbation, which is clearly 726  
evident from the transfer of adaptation observed in participants who trained and 727  
transferred to the same extrinsic target. Furthermore, the slow washout compared to 728  
the fast initial adaptation could not be explained purely by acting explicitly. Although 729  
implicit and explicit learning are separate processes [54], they may work concurrently or 730  
may be activated in a different phase of adaptation, which could explain the apparent 731  
contradiction between fast adaptation and slow washout that we observed in the current 732  
study. In future studies, the contribution of implicit and explicit learning may be tested 733  
using several methods, including clamped feedback [51], delayed feedback [55], limited 734  
reaction time [56] and aim reporting [54]. 735

Our results showed that participants succeeded in compensating for visuomotor rotation; this raised the question of whether they learned the perturbation in extrinsic or intrinsic coordinates. We observed a transfer of the adaptation when participants in the Extrinsic group transferred into a different initial hand orientation. Together with the absence of transfer in the Intrinsic group, it is implied that the learning occurred within an extrinsic coordinate system, rather than in an intrinsic one or in a combination of both. This result suggests that the visuomotor rotation alters the transformation remapping the hand's orientation in extrinsic coordinates onto its intrinsic coordinates, i.e., inverse kinematics, rather than the mapping between the intrinsic representation of the orientation and the muscle activation required to make successful rotations. Our result is in agreement with the extrinsic encoding of arm kinematics observed in translation movements [4, 5, 18, 22]. However, the variability in the aiming axes in the first TFR trial of the Intrinsic group may indicate a mixed coordinate model, as previously suggested in reaching movements [24]. This is less likely given our data since the effect vanished fast. Future work is needed to establish a deeper understanding, possibly by performing dense sampling of the generalization function to different targets in each of the initial orientations [23].

While our results suggest that humans represent the orientation of rigid bodies that are manipulated by the hand in extrinsic coordinates, previous studies have suggested that cognitive perception may change these coordinates [16]. One way to test this hypothesis is to associate the controlled cursor with either one of the reference frames during adaptation and test for the effect on the transfer of the adaptation. This could possibly be done by attaching a three-axis frame to the cursor, or by showing the entire arm in the experimental scene rather than just the manipulated object.

Beyond pure theoretical interest, movement representations have important practical implications in many fields. One such field is teleoperation. During teleoperation, users manipulate a leading robotic manipulator to control the movement of a follower manipulator. The follower is usually viewed through one or more cameras. Controlling the follower primarily requires that the user plan a desired movement in the follower's reference frame. Then, to determine the required motion of the leader device, the user must be able to transform that frame into the leader's reference frame. This mental transformation becomes difficult when the frames are misaligned [37], potentially

affecting the performance of the user [57]. Our results contribute to a deeper understanding of how humans may represent and compensate for visual remapping in teleoperation systems. Moreover, they highlight the importance of appropriate planning of the rotational workspace [58]. The visuomotor rotation discussed in this paper is relevant for robotic teleoperation if the leader-follower frames or camera viewpoint are misaligned due to failures of the operator to control the camera viewpoint, misreading by sensors, or an incorrect kinematic model of the robot [49, 59–62]. The previously reported difficulty in compensating for such distortions [49] is consistent with the partial adaptation that we observed in our visuomotor rotation experiment.

Additionally, our novel rotation-based visual perturbation has implications in the field of neurorehabilitation. Robotic neurorehabilitation utilizes motor tasks to induce neural plasticity that will improve motor function and help in recovery from post injury loss of motor abilities [63, 64]. For example, a recent study demonstrated the ability to personalize robotic rehabilitation training and monitor motor improvement in reaching by linking it to visuomotor adaptation [65]. However, there have also been many reports concerning the lack of generalization from such oversimplified movements to activities of daily living [66]. Perturbation of rotational variables could be another approach that would lead to motor improvement in patients with wrist rotation dysfunction, and could be included in recovery treatment schedules [36, 37]. However, previous attempts translated wrist rotations into movements of a planar cursor, and it is possible that manipulation of realistic objects with three degrees of freedom, as implemented in the current study, could contribute to better generalization to real-life activities.

## Conclusions

The experiments reported here established a basic understanding regarding the control of the orientation of rigid bodies. We characterized orientation-matching movements by their geodicity in  $\mathbb{H}_1$ , and found evidence of kinematic control. We also studied adaptation to a visuomotor rotation applied on the rotation of the hand, rather than on its translation. We found that the sensorimotor system adapts to this visuomotor perturbation, probably by forming an extrinsic representation of the new mapping between the orientation of the hand and the orientation of the controlled object, and

uses it to compensate for the visuomotor rotation. Understanding the control of the orientation of objects is an important and insufficiently studied aspect of the control of movement, with many practical applications such as the control of human-centered teleoperation systems and neurorehabilitation.

## Supporting information

### S1 Appendix A. Statistical analysis of the aiming angle

The time course of the aiming angles, averaged across participants, is depicted in Fig 8b. We performed a two-way mixed model ANOVA test to identify significant statistical differences in the aiming angles between participants from three different groups (Extrinsic, Intrinsic, Control) and between key trials within the groups (60, 120, 121, 300, 301, 360). The individual data, as well as the mean aiming angles, are depicted in Fig 8c. The statistical analysis disclosed a significant main effect of the group, the trial and their interaction (Group:  $F_{2,27} = 7.81$ ,  $p = 0.002$ ,  $\eta_p^2 = 0.36$ , Trial:  $F_{5,135} = 34.81$ ,  $p < 0.001$ ,  $\eta_p^2 = 0.56$ , Group $\times$ trial:  $F_{10,135} = 2.36$ ,  $p = 0.01$ ,  $\eta_p^2 = 0.15$ ).

The multiple comparison analyses did not reveal significant changes in the aiming angle when the perturbation was first applied, compared to the end of the BL1 session in all groups, although a large effect was observed in the Extrinsic group (Extrinsic:  $t_{27} = 1.69$ ,  $p = 1$ ,  $d = 0.89$ , Intrinsic:  $t_{27} = 0.24$ ,  $p = 1$ ,  $d = 0.06$ , Control:  $t_{27} = 0.64$ ,  $p = 1$ ,  $d = 0.21$ ). As expected, the aiming angle increased throughout the TRN session in all groups (Extrinsic:  $t_{27} = 3.3$ ,  $p = 0.04$ ,  $d = 1.41$ , Intrinsic:  $t_{27} = 5.67$ ,  $p < 0.001$ ,  $d = 1.4$ , Control:  $t_{27} = 5.99$ ,  $p < 0.001$ ,  $d = 2.09$ ), yet a complete 60° change from the ideal BL1 axis was not achieved (Extrinsic: 42.95°, Intrinsic: 38.98°, Control: 38°). When transferred to an orthogonal initial hand orientation, participants in the Extrinsic group deviated in the direction opposite to the perturbation compared to the end of the BL2 session, as opposed to participants in the Intrinsic group (Extrinsic:  $t_{27} = 4.19$ ,  $p = 0.004$ ,  $d = 1.69$ , Intrinsic:  $t_{27} = 0.22$ ,  $p = 1$ ,  $d = 0.05$ ). This shows that participants adapted to the perturbation by rotating around a new axis in extrinsic coordinates. In addition, we did not observe an aftereffect of adaptation in the Control group, which indicates that the visuomotor rotation was not generalized to an orthogonally oriented target ( $t_{27} = 1.67$ ,  $p = 1$ ,  $d = 0.72$ ). By the end of the TFR session, participants in all



groups behaved as in BL2 (Extrinsic:  $t_{27} = 0.87$ ,  $p = 1$ ,  $d = 0.23$ , Intrinsic:  $t_{27} = 0.006$ ,  
 $p = 1$ ,  $d = 0.002$ , Control:  $t_{27} = 1.39$ ,  $p = 1$ ,  $d = 0.52$ ). As such, the aiming angles in  
the Extrinsic group were reduced between the first and last TFR trials, while the  
aiming angles in the Intrinsic and Control groups did not change significantly (Extrinsic:  
 $t_{27} = 3.18$ ,  $p = 0.05$ ,  $d = 1.08$ , Intrinsic:  $t_{27} = 0.21$ ,  $p = 1$ ,  $d = 0.05$ , Control:  $t_{27} =$   
 $0.34$ ,  $p = 1$ ,  $d = 0.15$ ).

The groups differed only in the first TFR trial, although a non-significant difference  
was observed between the Extrinsic and Intrinsic groups (Extrinsic vs. Intrinsic:  $t_{27} =$   
 $2.18$ ,  $p = 0.11$ ,  $d = 0.9$ , Extrinsic vs. Control:  $t_{27} = 3.63$ ,  $p = 0.003$ ,  $d = 2$ , Intrinsic vs.  
Control:  $t_{27} = 1.45$ ,  $p = 0.47$ ,  $d = 0.61$ ). The lack of any clear distinction between the  
Extrinsic and Intrinsic groups raises the possibility of a mixed coordinates model.  
However, the large effect size ( $d = 0.9$ ) challenges this hypothesis. Moreover, this effect  
vanishes fast, as a similar analysis on the average of the first three TFR aiming axes  
successfully distinguished between the Extrinsic and both the Intrinsic and Control  
groups, but not between the Intrinsic and Control groups (Extrinsic vs. Intrinsic:  $t_{27} =$   
 $3.19$ ,  $p = 0.01$ ,  $d = 1.44$ , Extrinsic vs. Control:  $t_{27} = 5.61$ ,  $p < 0.001$ ,  $d = 2.83$ ,  
Intrinsic vs. Control:  $t_{27} = 2.41$ ,  $p = 0.07$ ,  $d = 0.97$ ).

All other comparisons between groups yielded  $p > 0.05$ . There was no significant  
difference in the last BL1 trial (Extrinsic vs. Intrinsic:  $t_{27} = 1.83$ ,  $p = 0.23$ ,  $d = 0.74$ ,  
Extrinsic vs. Control:  $t_{27} = 0.88$ ,  $p = 1$ ,  $d = 0.59$ , Intrinsic vs. Control:  $t_{27} = 0.95$ ,  $p =$   
 $1$ ,  $d = 0.37$ ), the last BL2 trial (Extrinsic vs. Intrinsic:  $t_{27} = 1.33$ ,  $p = 0.58$ ,  $d =$   
 $0.52$ , Extrinsic vs. Control:  $t_{27} = 1.16$ ,  $p = 0.76$ ,  $d = 0.54$ , Intrinsic vs. Control:  $t_{27} =$   
 $0.16$ ,  $p = 1$ ,  $d = 0.08$ ), the first TRN trial (Extrinsic vs. Intrinsic:  $t_{27} = 2.17$ ,  $p = 0.11$ ,  
 $d = 1.01$ , Extrinsic vs. Control:  $t_{27} = 2.51$ ,  $p = 0.06$ ,  $d = 1.28$ , Intrinsic vs. Control:  
 $t_{27} = 0.34$ ,  $p = 1$ ,  $d = 0.13$ ), the last TRN trial (Extrinsic vs. Intrinsic:  $t_{27} = 0.72$ ,  $p =$   
 $1$ ,  $d = 0.33$ , Extrinsic vs. Control:  $t_{27} = 0.89$ ,  $p = 1$ ,  $d = 0.34$ , Intrinsic vs. Control:  $t_{27} =$   
 $0.18$ ,  $p = 1$ ,  $d = 0.09$ ) and the last TFR trial (Extrinsic vs. Intrinsic:  $t_{27} = 0.12$ ,  $p =$   
 $1$ ,  $d = 1.01$ , Extrinsic vs. Control:  $t_{27} = 1.2$ ,  $p = 0.71$ ,  $d = 0.51$ , Intrinsic vs. Control:  
 $t_{27} = 1.32$ ,  $p = 0.58$ ,  $d = 0.62$ ).

## References

1. Flash T, Hogan N. The coordination of arm movements: an experimentally confirmed mathematical model. *J Neurosci*. 1985;5(7):1688–1703. doi:10.1523/JNEUROSCI.05-07-01688.1985.
2. Morasso P. Spatial control of arm movements. *Exp Brain Res*. 1981;42(2):223–227. doi:10.1007/BF00236911.
3. Lacquaniti F, Soechting JF. Coordination of arm and wrist motion during a reaching task. *J Neurosci*. 1982;2(4):399–408. doi:10.1523/JNEUROSCI.02-04-00399.1982.
4. Gordon J, Ghilardi MF, Ghez C. Accuracy of planar reaching movements. *Exp Brain Res*. 1994;99(1):97–111. doi:10.1007/BF00241415.
5. Flanagan JR, Rao AK. Trajectory adaptation to a nonlinear visuomotor transformation: evidence of motion planning in visually perceived space. *Journal of Neurophysiology*. 1995;74(5):2174–2178. doi:10.1152/jn.1995.74.5.2174.
6. Scheidt RA, Ghez C. Separate Adaptive Mechanisms for Controlling Trajectory and Final Position in Reaching. *Journal of Neurophysiology*. 2007;98(6):3600–3613. doi:10.1152/jn.00121.2007.
7. Shadmehr R, Mussa-Ivaldi FA. Adaptive representation of dynamics during learning of a motor task. *J Neurosci*. 1994;14(5):3208–3224. doi:10.1523/JNEUROSCI.14-05-03208.1994.
8. Rotella MF, Nisky I, Koehler M, Rinderknecht MD, Bastian AJ, Okamura AM. Learning and generalization in an isometric visuomotor task. *Journal of Neurophysiology*. 2015;113(6):1873–1884. doi:10.1152/jn.00255.2014.
9. Todorov E, Jordan MI. Optimal feedback control as a theory of motor coordination. *Nat Neurosci*. 2002;5(11):1226–1235. doi:10.1038/nn963.
10. Todorov E. Stochastic Optimal Control and Estimation Methods Adapted to the Noise Characteristics of the Sensorimotor System. *Neural Computation*. 2005;17(5):1084–1108. doi:10.1162/0899766053491887.

11. Berret B, Conessa A, Schweighofer N, Burdet E. Stochastic optimal feedforward-feedback control determines timing and variability of arm movements with or without vision. *PLOS Computational Biology*. 2021;17(6):e1009047. doi:10.1371/journal.pcbi.1009047.
12. Donchin O, Francis JT, Shadmehr R. Quantifying Generalization from Trial-by-Trial Behavior of Adaptive Systems that Learn with Basis Functions: Theory and Experiments in Human Motor Control. *J Neurosci*. 2003;23(27):9032–9045. doi:10.1523/JNEUROSCI.23-27-09032.2003.
13. Thoroughman KA, Shadmehr R. Learning of action through adaptive combination of motor primitives. *Nature*. 2000;407(6805):742–747. doi:10.1038/35037588.
14. Smith MA, Ghazizadeh A, Shadmehr R. Interacting Adaptive Processes with Different Timescales Underlie Short-Term Motor Learning. *PLOS Biology*. 2006;4(6):e179. doi:10.1371/journal.pbio.0040179.
15. Taylor JA, Ivry RB. Flexible Cognitive Strategies during Motor Learning. *PLOS Computational Biology*. 2011;7(3):e1001096. doi:10.1371/journal.pcbi.1001096.
16. Danziger Z, Mussa-Ivaldi FA. The Influence of Visual Motion on Motor Learning. *J Neurosci*. 2012;32(29):9859–9869. doi:10.1523/JNEUROSCI.5528-11.2012.
17. Shadmehr R, Krakauer JW. A computational neuroanatomy for motor control. *Exp Brain Res*. 2008;185(3):359–381. doi:10.1007/s00221-008-1280-5.
18. Wolpert DM, Ghahramani Z, Jordan MI. An Internal Model for Sensorimotor Integration. *Science*. 1995;269(5232):1880–1882. doi:10.1126/science.7569931.
19. Jordan MI, Rumelhart DE. Forward models: Supervised learning with a distal teacher. *Cognitive Science*. 1992;16(3):307–354. doi:10.1016/0364-0213(92)90036-T.
20. Bastian AJ. Learning to predict the future: the cerebellum adapts feedforward movement control. *Current Opinion in Neurobiology*. 2006;16(6):645–649. doi:10.1016/j.conb.2006.08.016.

21. Slotine JJE. The Robust Control of Robot Manipulators. *The International Journal of Robotics Research*. 1985;4(2):49–64. doi:10.1177/027836498500400205.
22. Krakauer JW, Pine ZM, Ghilardi MF, Ghez C. Learning of Visuomotor Transformations for Vectorial Planning of Reaching Trajectories. *J Neurosci*. 2000;20(23):8916–8924. doi:10.1523/JNEUROSCI.20-23-08916.2000.
23. Brayanov JB, Press DZ, Smith MA. Motor Memory Is Encoded as a Gain-Field Combination of Intrinsic and Extrinsic Action Representations. *J Neurosci*. 2012;32(43):14951–14965. doi:10.1523/JNEUROSCI.1928-12.2012.
24. Poh E, Taylor JA. Generalization via superposition: combined effects of mixed reference frame representations for explicit and implicit learning in a visuomotor adaptation task. *Journal of Neurophysiology*. 2019;121(5):1953–1966. doi:10.1152/jn.00624.2018.
25. Herbort O, Butz MV. Planning and control of hand orientation in grasping movements. *Exp Brain Res*. 2010;202(4):867–878. doi:10.1007/s00221-010-2191-9.
26. Gosselin-Kessiby N, Messier J, Kalaska JF. Evidence for Automatic On-Line Adjustments of Hand Orientation During Natural Reaching Movements to Stationary Targets. *Journal of Neurophysiology*. 2008;99(4):1653–1671. doi:10.1152/jn.00980.2007.
27. Roby-Brami A, Bennis N, Mokhtari M, Baraduc P. Hand orientation for grasping depends on the direction of the reaching movement. *Brain Research*. 2000;869(1):121–129. doi:10.1016/S0006-8993(00)02378-7.
28. Bennis N, Roby-Brami A. Coupling between reaching movement direction and hand orientation for grasping. *Brain Research*. 2002;952(2):257–267. doi:10.1016/S0006-8993(02)03250-X.
29. Fan J, He J, Tillery SIH. Control of hand orientation and arm movement during reach and grasp. *Exp Brain Res*. 2006;171(3):283–296. doi:10.1007/s00221-005-0277-6.

30. Soechting JF, Flanders M. Parallel, interdependent channels for location and orientation in sensorimotor transformations for reaching and grasping. *Journal of Neurophysiology*. 1993;70(3):1137–1150. doi:10.1152/jn.1993.70.3.1137.
31. Desmurget M, Prablanc C. Postural Control of Three-Dimensional Prehension Movements. *Journal of Neurophysiology*. 1997;77(1):452–464. doi:10.1152/jn.1997.77.1.452.
32. Torres EB, Zipser D. Reaching to Grasp With a Multi-Jointed Arm. I. Computational Model. *Journal of Neurophysiology*. 2002;88(5):2355–2367. doi:10.1152/jn.00030.2002.
33. Fan J, He J. Motor Cortical Encoding of Hand Orientation in a 3-D Reach-to-grasp Task. In: 2006 International Conference of the IEEE Engineering in Medicine and Biology Society; 2006. p. 5472–5475.
34. Arbib MA. Perceptual Structures and Distributed Motor Control. In: *Comprehensive Physiology*. John Wiley & Sons, Ltd; 2011. p. 1449–1480. Available from: <https://onlinelibrary.wiley.com/doi/abs/10.1002/cphy.cp010233>.
35. Charles SK. It's all in the wrist : a quantitative characterization of human wrist control [Thesis]. Massachusetts Institute of Technology; 2008. Available from: <https://dspace.mit.edu/handle/1721.1/45623>.
36. Charles SK, Hogan N. The curvature and variability of wrist and arm movements. *Exp Brain Res*. 2010;203(1):63–73. doi:10.1007/s00221-010-2210-x.
37. Masia L, Casadio M, Sandini G, Morasso P. Eye-Hand Coordination during Dynamic Visuomotor Rotations. *PLOS ONE*. 2009;4(9):e7004. doi:10.1371/journal.pone.0007004.
38. Campolo D, Accoto D, Formica D, Guglielmelli E. Intrinsic Constraints of Neural Origin: Assessment and Application to Rehabilitation Robotics. *IEEE Transactions on Robotics*. 2009;25(3):492–501. doi:10.1109/TRO.2009.2019781.

39. Campolo D, Formica D, Guglielmelli E, Keller F. Kinematic analysis of the human wrist during pointing tasks. *Exp Brain Res*. 2010;201(3):561–573. doi:10.1007/s00221-009-2073-1.
40. Campolo D, Widjaja F, Esmaeili M, Burdet E. Pointing with the wrist: a postural model for Donders' law. *Exp Brain Res*. 2011;212(3):417–427. doi:10.1007/s00221-011-2747-3.
41. Dorman GR, Davis KC, Peadar AW, Charles SK. Control of redundant pointing movements involving the wrist and forearm. *Journal of Neurophysiology*. 2018;120(4):2138–2154. doi:10.1152/jn.00449.2017.
42. Fernandes HL, Albert MV, Kording KP. Measuring Generalization of Visuomotor Perturbations in Wrist Movements Using Mobile Phones. *PLOS ONE*. 2011;6(5):e20290. doi:10.1371/journal.pone.0020290.
43. Barra J, Mégard C, Vidal M. New Visuomotor Mappings of Wrist Rotations Are Ignored if Continuous Visual Feedback Is Available. *Presence: Teleoperators and Virtual Environments*. 2013;22(4):308–322.
44. Shoemake K. Animating rotation with quaternion curves. In: *Proceedings of the 12th annual conference on Computer graphics and interactive techniques. SIGGRAPH '85*. New York, NY, USA: Association for Computing Machinery; 1985. p. 245–254. Available from: <https://doi.org/10.1145/325334.325242>.
45. Carmack J. Latency mitigation strategies (by John Carmack); Available from: <https://danluu.com/latency-mitigation/>.
46. Tsagris M, Athineou G, Adam C, Sajib A, Amson E, Waldstein MJ. Directional: A Collection of Functions for Directional Data Analysis; 2022. Available from: <https://CRAN.R-project.org/package=Directional>.
47. Shabbott BA, Sainburg RL. Learning a visuomotor rotation: simultaneous visual and proprioceptive information is crucial for visuomotor remapping. *Experimental Brain Research*. 2010;203(1):75–87. doi:10.1007/s00221-010-2209-3.
48. Buzzi J, De Momi E, Nisky I. An Uncontrolled Manifold Analysis of Arm Joint Variability in Virtual Planar Position and Orientation Telemanipulation. *IEEE*

- Transactions on Biomedical Engineering. 2019;66(2):391–402.  
doi:10.1109/TBME.2018.2842458.
49. Kim LH, Bargar C, Che Y, Okamura AM. Effects of master-slave tool misalignment in a teleoperated surgical robot. In: 2015 IEEE International Conference on Robotics and Automation (ICRA); 2015. p. 5364–5370.
  50. Hadjiosif AM, Krakauer JW. The explicit/implicit distinction in studies of visuomotor learning: Conceptual and methodological pitfalls. *European Journal of Neuroscience*. 2020;53(2):499–503. doi:10.1111/ejn.14984.
  51. Morehead JR, Taylor JA, Parvin DE, Ivry RB. Characteristics of Implicit Sensorimotor Adaptation Revealed by Task-irrelevant Clamped Feedback. *Journal of Cognitive Neuroscience*. 2017;29(6):1061–1074.
  52. Morehead JR, Xivry JJOd. A Synthesis of the Many Errors and Learning Processes of Visuomotor Adaptation. bioRxiv; 2021. Available from: <https://www.biorxiv.org/content/10.1101/2021.03.14.435278v1>.
  53. Taylor JA, Krakauer JW, Ivry RB. Explicit and Implicit Contributions to Learning in a Sensorimotor Adaptation Task. *J Neurosci*. 2014;34(8):3023–3032. doi:10.1523/JNEUROSCI.3619-13.2014.
  54. McDougle SD, Bond KM, Taylor JA. Explicit and Implicit Processes Constitute the Fast and Slow Processes of Sensorimotor Learning. *Journal of Neuroscience*. 2015;35(26):9568–9579. doi:10.1523/JNEUROSCI.5061-14.2015.
  55. Schween R, Hegele M. Feedback delay attenuates implicit but facilitates explicit adjustments to a visuomotor rotation. *Neurobiology of learning and memory*. 2017;140:124–133.
  56. McDougle SD, Taylor JA. Dissociable cognitive strategies for sensorimotor learning. *Nature communications*. 2019;10(1):40–13.
  57. Chen JYC, Haas EC, Barnes MJ. Human Performance Issues and User Interface Design for Teleoperated Robots. *IEEE Transactions on Systems, Man, and Cybernetics, Part C (Applications and Reviews)*. 2007;37(6):1231–1245. doi:10.1109/TSMCC.2007.905819.

58. Zoller EI, Gerig N, Cattin PC, Rauter G. The Functional Rotational Workspace of a Human-Robot System can be Influenced by Adjusting the Telemanipulator Handle Orientation. *IEEE Transactions on Haptics*. 2021;14(2):335–346. doi:10.1109/TOH.2020.3027261.
59. Mahler J, Krishnan S, Laskey M, Sen S, Murali A, Kehoe B, et al. Learning accurate kinematic control of cable-driven surgical robots using data cleaning and Gaussian Process Regression. In: 2014 IEEE International Conference on Automation Science and Engineering (CASE); 2014. p. 532–539.
60. Ames C, Frisella AJ, Yan Y, Shulam P, Landman J. Evaluation of Laparoscopic Performance with Alteration in Angle of Vision. *Journal of Endourology*. 2006;20(4):281–283. doi:10.1089/end.2006.20.281.
61. Ellis SR, Adelstein BD, Yeom K. Human Control in Rotated Frames: Anisotropies in the Misalignment Disturbance Function of Pitch, Roll, and Yaw. *Proceedings of the Human Factors and Ergonomics Society Annual Meeting*. 2012;56(1):1336–1340. doi:10.1177/1071181312561385.
62. Wu L, Yu F, Wang J, Do TN. Camera Frame Misalignment in a Teleoperated Eye-in-Hand Robot: Effects and a Simple Correction Method. arXiv:210508466 [cs]. 2021;.
63. Di Pino G, Pellegrino G, Assenza G, Capone F, Ferreri F, Formica D, et al. Modulation of brain plasticity in stroke: a novel model for neurorehabilitation. *Nature Reviews Neurology*. 2014;10(10):597–608. doi:10.1038/nrneurol.2014.162.
64. Marchal-Crespo L, Reinkensmeyer DJ. Review of control strategies for robotic movement training after neurologic injury. *Journal of NeuroEngineering and Rehabilitation*. 2009;6(1):20. doi:10.1186/1743-0003-6-20.
65. Giang C, Pirondini E, Kinany N, Pierella C, Panarese A, Coscia M, et al. Motor improvement estimation and task adaptation for personalized robot-aided therapy: a feasibility study. *BioMedical Engineering OnLine*. 2020;19(1):33. doi:10.1186/s12938-020-00779-y.



66. Wulf G, Shea CH. Principles derived from the study of simple skills do not generalize to complex skill learning. *Psychonomic bulletin & review*. 2002;9(2):185–211.
